# Supplementary material for: Numerical operations in living cells by programmable RNA devices
Source: PubMed Central journal article supplement (PMC6703868; doi:10.1126/sciadv.aax0835), 2019-08-21
Supplement: aax0835_SM.pdf [file aax0835_SM.pdf]

## Supplementary Materials for

### **Numerical operations in living cells by programmable RNA devices**

Kei Endo\*, Karin Hayashi, Hirohide Saito\*

\*Corresponding author. Email: kei-endo@k.u-tokyo.ac.jp (K.E.); hirohide.saito@cira.kyoto-u.ac.jp (H.S.)

Published 21 August 2019, *Sci. Adv.* **5**, eaax0835 (2019)  
DOI: 10.1126/sciadv.aax0835

#### **This PDF file includes:**

Supplementary Text

Fig. S1. The effect of miRNA inhibitors on the measurement.

Fig. S2. The positional effect of miRNA target sequences in synthetic mRNAs for miRNA-mediated repression.

Fig. S3. Steps in the normalization of the screening data in Fig. 4.

Fig. S4. Live cell classification with four synthetic mRNAs.

Fig. S5. Tracking of hiPSCs with four five-slot mRNAs.

Table S1. 5'UTR sequences of the five-slot mRNAs used in this study.

Table S2. 5'UTR sequences of the single-slot mRNAs used in this study.

Table S3. List of primers, single-stranded oligo DNAs, and plasmids for PCR amplification.

Table S4. List of experimental conditions.

## Supplementary Text

### Indices for reporter fluorescent protein expressions from synthetic mRNAs

The fluorescence intensity of a cell transfected with fluorescent protein-encoding mRNAs typically ranged over 100 fold, and the fluorescent intensities of single cells co-transfected with two mRNAs coding distinct fluorescent proteins showed high consistency (20). Thus, throughout the analyses, we calculated *fluorescence ratio*, which is the ratio of the intensities of two fluorescent proteins in a cell. Here is an example

$$\text{Fluorescence ratio} = \frac{[hmAG1]}{[tagBFP]} \quad (1)$$

[hmAG1] and [tagBFP] describe the fluorescence intensity of hmAG1 and tagBFP protein, respectively, in each analyzed cell. To compare the behavior of the designed mRNAs, we define *reporter expression* as the normalized geometric mean of *fluorescence ratio* in a transfected population. That is, the fluorescence intensity from a reporter mRNA is divided by the fluorescence intensity from the transfection control mRNAs encoding a different fluorescent protein. Then, the mean ratio of the fluorescence from the reporter mRNA is normalized by the fluorescence intensity of the control mRNA that encodes the same fluorescent protein as the reporter and is free from miRNA target sequences. In the proof-of-principle experiments shown in Figure 2 and 3, a five-slot reporter mRNA encodes hmAG1 and the transfection control mRNA encodes tagBFP. Thus, *reporter expression* in these analyses is as follows

$$\text{Reporter expression} = \left\langle \frac{[hmAG1]_{\text{reporter}}}{[tagBFP]} \right\rangle \left/ \left\langle \frac{[hmAG1]_{\text{control}}}{[tagBFP]} \right\rangle \right. \quad (2)$$

In the screening experiments shown in Figures 4 and 5, single-slot reporter mRNAs encode hmAG1, tagBFP or hdKRed, and the transfection control mRNA encodes hmKO2.

We observed that mRNAs composed of different 5' UTR sequences expressed different levels of reporter proteins regardless of miRNA activity. To evaluate the effect of miRNAs on the designed mRNAs accurately, we define *relative expression* as *reporter expression* normalized by *reporter expression* in the presence of all inhibitors for miRNAs to which the reporter mRNA responds. That is, *relative expression* of the designed mRNA in the presence of all corresponding inhibitors is set to 1

$$\text{Relative expression} = \frac{\text{Reporter expression}_{\text{condition\_of\_interest}}}{\text{Reporter expression}_{\text{w/_corresponding\_inhibitors}}} \quad (3)$$

### **A model for a multivariate linear combination**

We estimated *relative expression* of the designed multi-slot mRNAs. The additivity of the repression by multiple miRNAs is supported by the results in Figure 2C. Thus, we define *estimated expression* as the product of *relative expression* affected by each miRNA at each slot. If we represent *relative expression* by a miRNA at slot-*i* as  $\rho^i$ , then *estimated expression* is described as shown in Figure 3A

$$\text{Estimated expression} = \prod_i \rho^i \quad (4)$$

With Eq. 4 and a dataset of *relative expression* from a five-slot mRNA series responding to one of the four model miRNAs (e.g. Fig. 3A; see Supplementary Table S1 for the 5' UTR sequences), we performed data fitting by the least squares method to determine  $\rho^i$  ( $i = 1-5$ ) as shown in fig. S2B.

The activity of an miRNA in a cell should be represented as a unique value. In this study, the activity of miRNA-*a* is defined as the inverse of *relative expression* of an ideal mRNA responding to miRNA-*a* and denoted as  $-\log(\rho_a)$ . Based on the activity, the level of repression on a designed reporter mRNA is tuned by the position of the miRNA target sequence in the mRNA.

Thus, the repression by miRNA-*a* at slot-*i* is described as **local repression**,  $-\log(\rho_a^i)$ , which depends on ideal repression,  $-\log(\rho_a)$ , and the position of the slot, *i*. Using a position-dependent tuning factor,  $k_i$  (Fig. 1B), the positional effect at slot-*i* is hypothesized as follows

$$\text{Local repression} : -\log(\rho_a^i) = -k_i \cdot \log(\rho_a) \quad (5)$$

According to the results shown in fig. S2, the tuning factor is a function of the distance of the slot from the start codon,  $d_i$ . Simultaneous data fitting by the least squares method shown in Figure 3C leads us to a model and a global constant that explain the positional effect of the slot independently of the miRNA species

$$k_i = d_i^{-0.56} \quad (6)$$

Eq. 6 indicates that the target sequence to miRNA-*a* of the ideal mRNA is located at one nucleotide from the start codon ( $d = 1$ ). According to Eq. 4, 5 and 6, the expression from a synthetic reporter mRNA responding to multiple miRNAs is estimated by a linear combination of the multiple miRNA activities in a cell

$$\log(\text{estimated expression}) = \sum_i \log(\rho_i^i) = \sum_i k_i \cdot \log(\rho_i) = \sum_i d_i^{-0.56} \cdot \log(\rho_i) \quad (7)$$

Here,  $\rho_i$  denotes the activity of an miRNA, the target sequence of which is located at slot-*i*. In Eq. 7, coefficients for multiple miRNA activities (tuning factors) are always positive. Then, the ratio of **estimated expression** extends the coefficient range to negative values

$$\begin{aligned} & \log(\text{estimated fluorescence ratio}) \\ &= \log(\text{estimated expression}_{mRNA[i]}) - \log(\text{estimated expression}_{mRNA[j]}) \\ &= \sum_i d_i^{-0.56} \cdot \log(\rho_i) + \sum_j (-d_j^{-0.56}) \cdot \log(\rho_j) \end{aligned} \quad (8)$$

Here, mRNA[*i*] and mRNA[*j*] indicate two distinct multi-slot mRNAs that encode different fluorescent proteins. Furthermore, the use of the ratio from two reporter mRNAs enables us to omit the transfectional control mRNA. Thus, the transfection of two synthetic reporter mRNAs results in one synthetic parameter that recapitulates a miRNA activity profile in a living cell according to the linear combinations described in Eq. 8.

### **Design of five-slot mRNA sets**

First, the normalized miRNA activity profiles (270 miRNAs in eight cell types) were subjected to multivariate statistical analysis to select miRNAs that were expected to have high potential to classify the eight different cell types shown in Figure 4D. According to the results of the principal component analysis (PCA) and cluster analysis with Ward's method, the miRNAs, the coefficients (contribution) of which for the first two components calculated by the PCA were the highest in each of the 49 clusters made by the cluster analysis, were selected as candidates. The profiles of the 49 miRNAs were further analyzed by PCA. Then, 26 of the 49 miRNAs were selected according to the absolute values of the contribution to the first two components calculated in the second PCA.

Next, the classification of the eight cell types was simulated based on the estimated expressions of a five-slot mRNA. The estimated expressions in the eight cell types of a systematically designed five-slot mRNA that responded to some of the selected 26 miRNAs were calculated. The mRNAs with an estimated expression in a cell type lower than 0.05 were screened out to avoid noise by the cellular autofluorescence. The design of the five slots that showed the highest variance among the cell types was adopted as the 5' UTR of the first reporter mRNA (encoding hmAG1, for example). To screen the 5' UTR of the second mRNA (hmKO2), the ratio of the estimated expressions from the systematically designed five-slot mRNAs to that from the determined first mRNA was systematically calculated. The design of the five slots that showed the highest variance of the ratio among the cell types was adopted. To screen the 5' UTR of the third mRNA (tagBFP), the correlation coefficient (*R*) and the two-dimensional variance (*V*) of the ratio of the estimated expressions from the first and the second mRNAs with the estimated expression from the systematically designed five-slot mRNAs was systematically calculated. The design of the 5' UTR was determined based on the criteria  $r < 0.3$  and  $\max(V)$ . Finally, using the

estimated expressions from three determined mRNAs and the systematically designed five-slot mRNAs as a fourth value, live cell classification with a set of four mRNAs was simulated (Fig. 4F). The mRNA set variance of two fluorescence ratios among the eight cell types was adopted.

Another set for tracking changes in hiPSCs was designed in a similar way except 11 out of 54 miRNAs were selected and used for the simulation and calculation (Fig. 5).

## Supplementary Figures

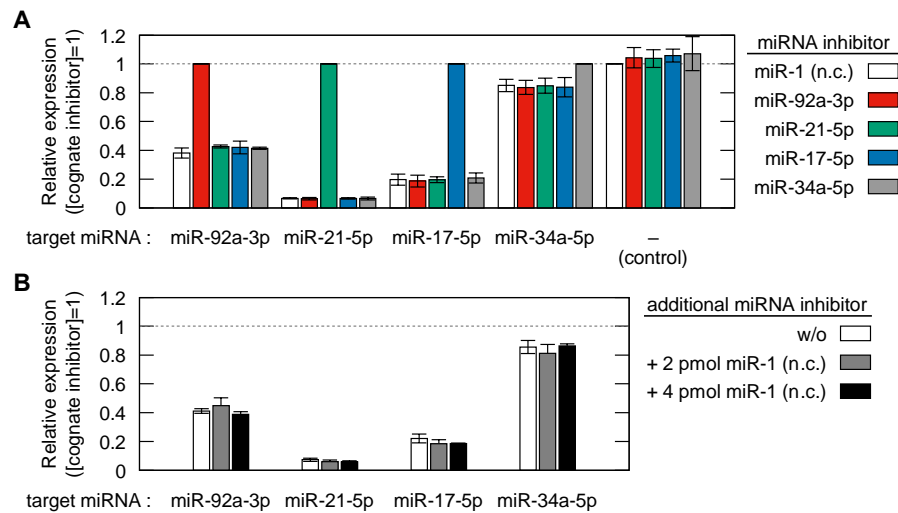

**Fig. S1. The effect of miRNA inhibitors on the measurement.** (A) Off-target effects of the miRNA inhibitors used in this study. The relative expression of single-slot mRNAs responding to the indicated miRNA (target miRNA) was measured in the presence of inhibitors for one of the four model miRNAs in this study or miR-1. The miR-1 inhibitor was used as a negative control. The relative expressions in the presence of the cognate inhibitor was set to 1. The 5' UTR of the control mRNA had no miRNA target sequence. Error bars indicate the mean  $\pm$  standard deviation ( $n=3$ ). In this condition, miRNA inhibitors showed no significant off-target effects. The relative expressions were measured in the presence of 2 pmol miRNA inhibitor. (B) Effect of the total amount of miRNA inhibitors. White bars (w/o) show the relative expressions of single-slot mRNAs measured in the same condition as in A, where the expression with the corresponding miRNA inhibitor was set to 1. Gray and black bars show the relative expressions measured in the presence of an additional 2 and 4 pmol miR-1 inhibitor, respectively. In total, 4 and 6 pmol miRNA inhibitors with reporter mRNAs were transfected into HeLa cells. Error bars indicate the mean  $\pm$  SD ( $N=3$ ). In these conditions, the total amount of miRNA inhibitors hardly affected the relative expression.

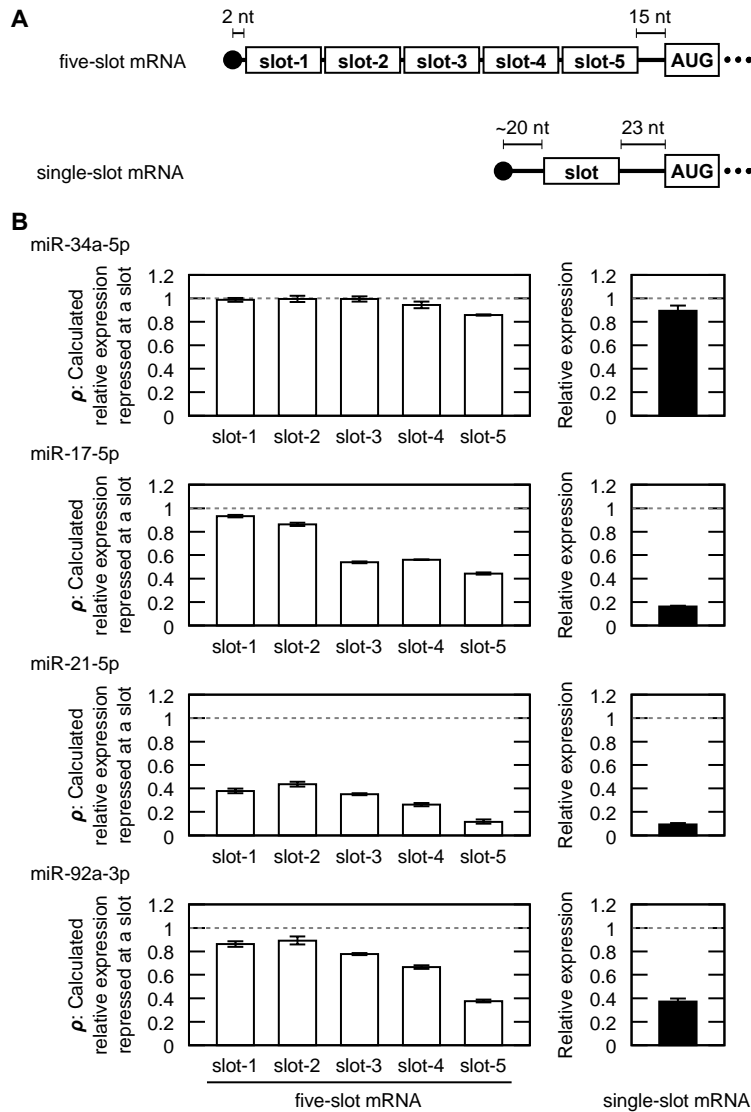

**Fig. S2. The positional effect of miRNA target sequences in synthetic mRNAs for miRNA-mediated repression.** (A) The 5' UTR designs of a five-slot (top) and a single-slot (bottom) mRNA. Boxes labeled with slots are the regions for the miRNA target sequences. Black circles and AUG depict a cap structure and the start codon of synthetic mRNAs, respectively. nt, nucleotides. (B) Repression by the four model miRNAs at different slots. The relative expressions of the five-slot mRNAs repressed by the indicated miRNA at the indicated slot ( $\rho$  values, gray bars) were obtained by fitting the results from the series of five-slot mRNAs (Fig. 3A, see Supplementary Table S1 for the sequences). The relative expression of single-slot mRNAs (black bars) was determined experimentally. Error bars indicate the mean  $\pm$  SD ( $N=3$ ). An outlier was excluded in the single-slot mRNA for miR-21.



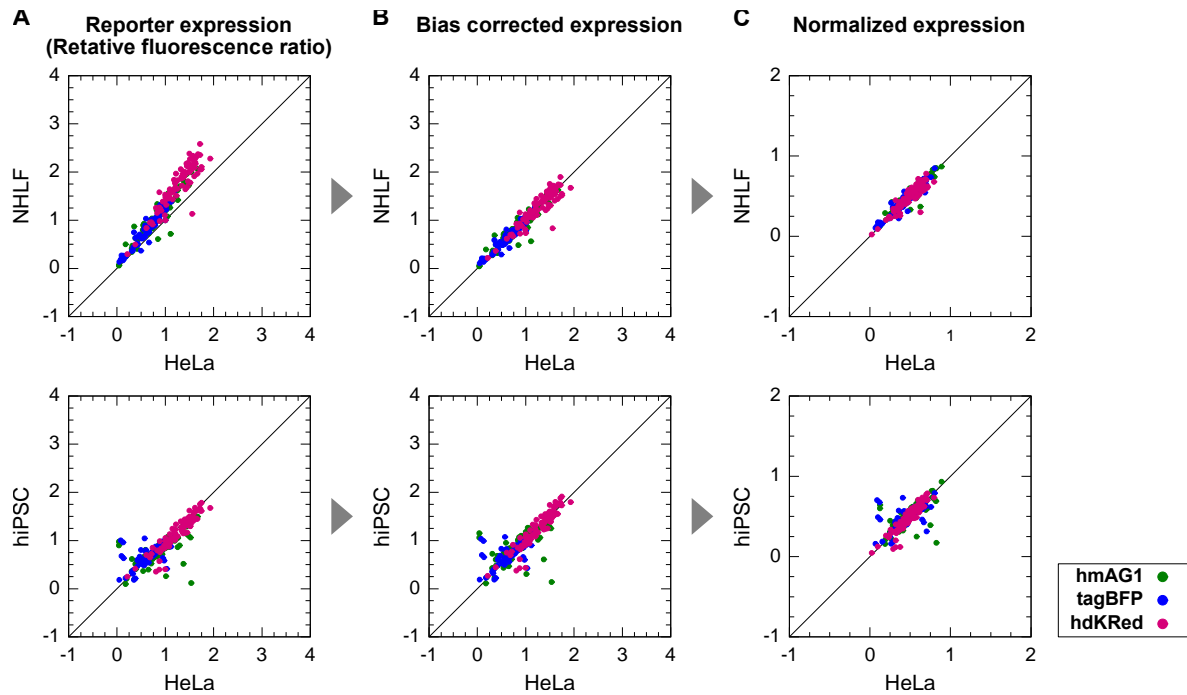

**Fig. S3. Steps in the normalization of the screening data in Fig. 4.** Three panels on the top show the normalization process for NHLFs and those on the bottom for hiPSCs based on expression data obtained from HeLa cells. Dots in a plot indicate the reporter expressions (A), the bias corrected expression (B), and the normalized expression (C) of 270 single-slot mRNAs encoding hmAG1 (green), tagBFP (blue) and hdKRed (purple). See Supplementary Text for details.

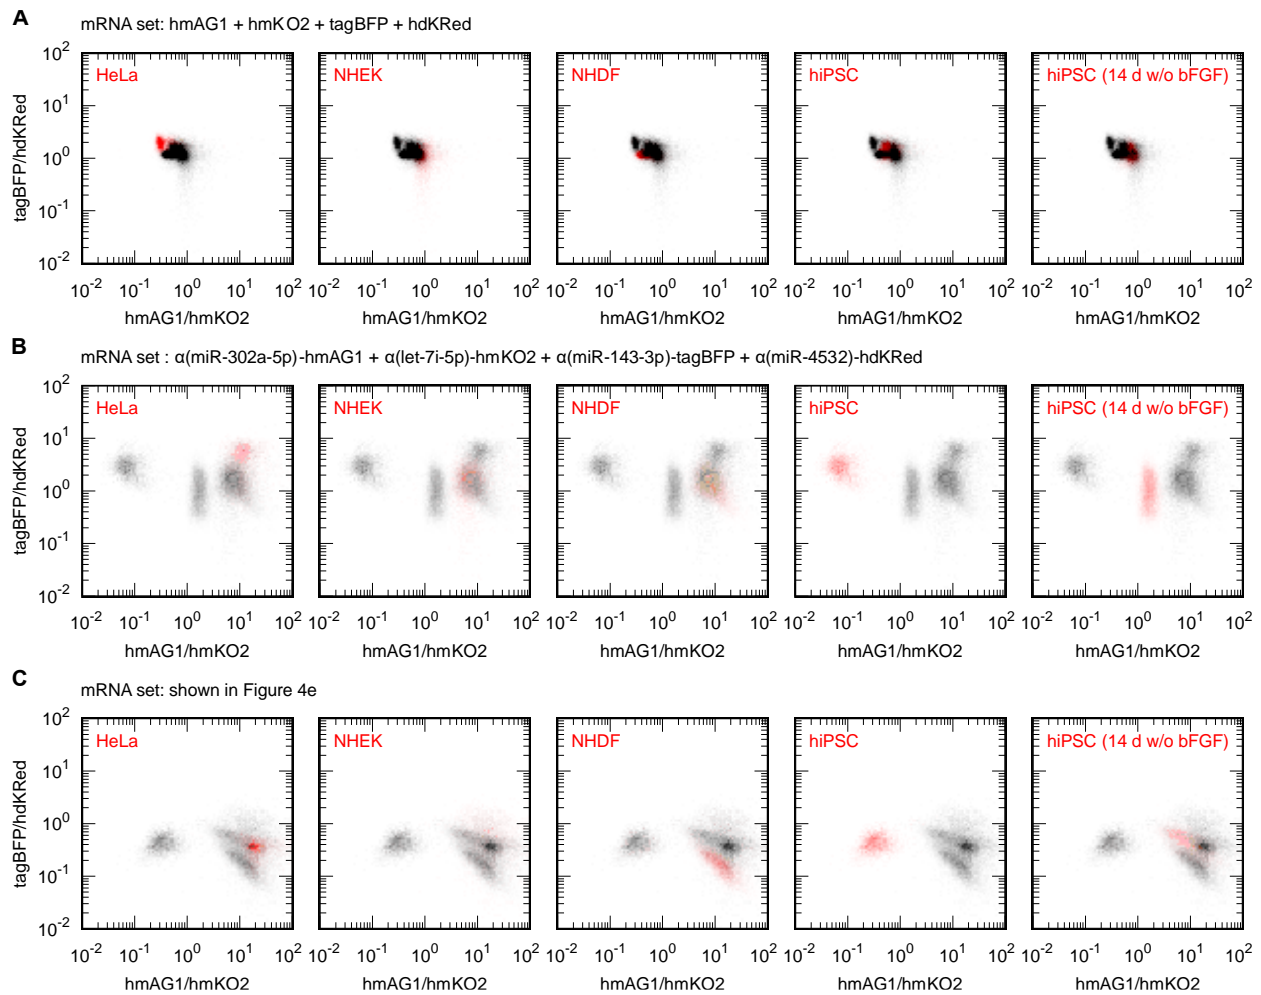

**Fig. S4. Live cell classification with four synthetic mRNAs.** Live cell classification with the transfection of four reporter mRNAs and flow cytometry. The indicated cells were transfected with the set of control mRNAs (**A**), set of four single-slot mRNAs (**B**), and set of four five-slot mRNAs used for tracking changes in hiPSCs (**C**, shown in Fig. 5E). In the principal component analysis shown in Fig. 4D, miR-302a-5p and let-7i-5p are the most weighted in component 1, and miR-143-3p and miR-4532 in component 2. The density of the cells analyzed by flow cytometry was plotted on two fluorescence ratios: hmAG1/hmKO2 and tagBFP/hdKRed. The indicated cells presented in red density and other cells in black density were merged.

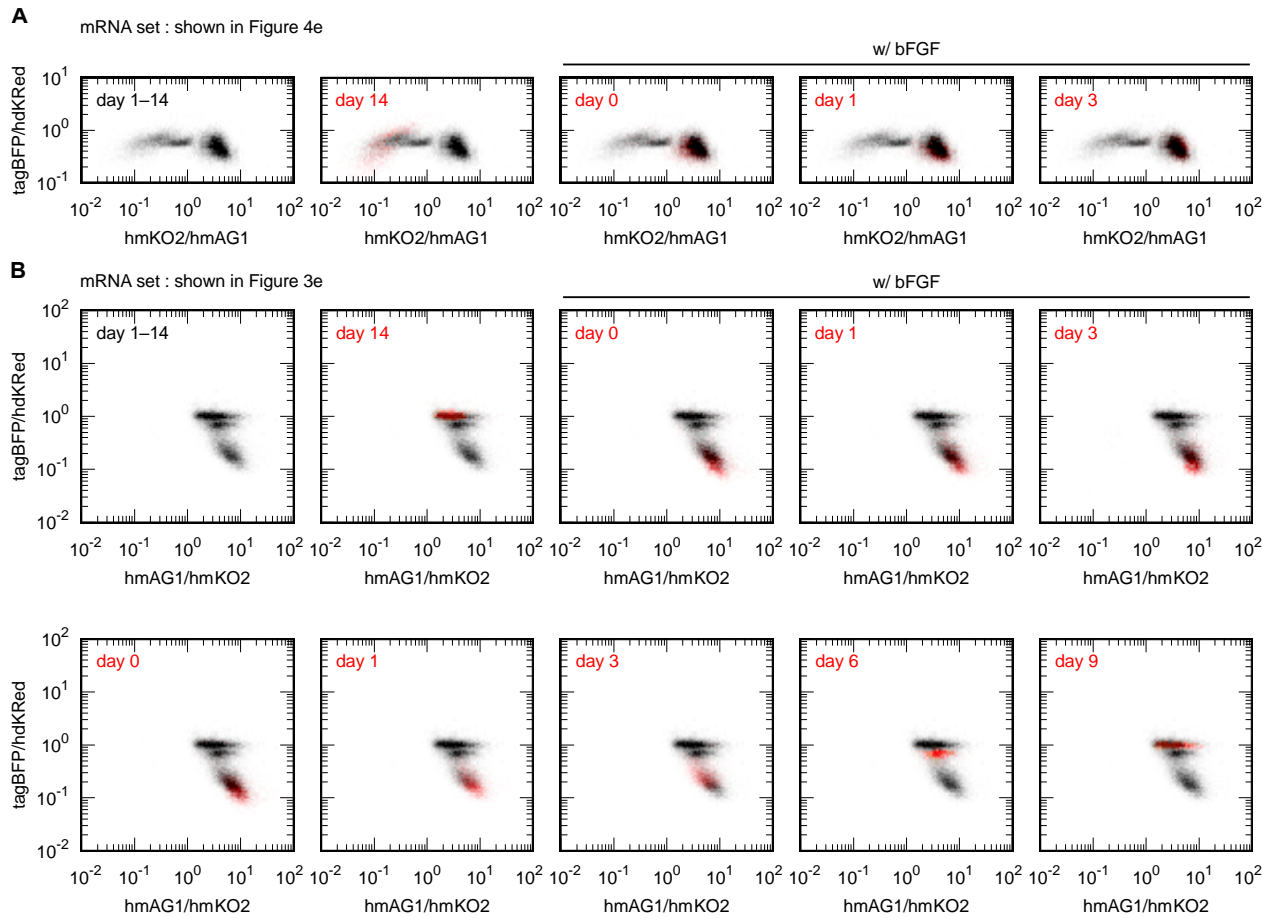

**Fig. S5. Tracking of hiPSCs with four five-slot mRNAs.** (A) Density plots of transfected hiPSCs cultured without bFGF for 14 days and those with bFGF for 0, 1, and 3 days before the transfection of the mRNA set for tracking hiPSCs changes (shown in Figure 5E). All density plots including those in Figure 5G were merged (day 1-14). The density of the indicated conditions is presented in red density over the merged plots. (B) Tracking of hiPSCs with the mRNAs set used in the classification of cell types (shown in Fig. 4E) with bFGF (top, 0, 1, and 3 days) or without bFGF. The X-axis of the plots represents hmAG1/hmKO2, as shown in Figure 4G and fig. S4. The transfected iPSCs at the indicated time points are presented in red density over the merged plots.

## Supplementary Tables

**Table S1. 5'UTR sequences of the five-slot mRNAs used in this study.**

| Figure  | slot-1     | slot-2     | slot-3     | slot-4     | slot-5     | 5' UTR sequence*1                                                                                                                               | Protein |
|---------|------------|------------|------------|------------|------------|-------------------------------------------------------------------------------------------------------------------------------------------------|---------|
| control | -          | -          | -          | -          | -          | GGCCGCUUGAAGUCUUUAAUUAAACCCGCUUGAAGUCUUUAAUUAA<br>ACGAACGGGCACGCUGACAAUUC AAGCACUCUGAUUUUGACAAUUAC<br>AAGCACUCUGAUUUUGACAAUUACACCCGGUCGCCACCAUG | hmAG1   |
| Fig. 2A | -          | miR-17-5p  | -          | miR-92a-3p | -          | GGCCGCUUGAAGUCUUUAAUUAAACUACCUGCACUGUAAGCACUUU<br>GCGAACGGGCACGCUGACAAUUACAGGCCGGGACAAGUGCAAUAAA<br>GCACUCUGAUUUUGACAAUUACACCCGGUCGCCACCAUG     | hmAG1   |
| Fig. 2A | miR-21-5p  | -          | -          | -          | miR-92a-3p | GGUCAACAUCAGUCUGAUUAGCUACC GCUUGAAGUCUUUAAUUAAA<br>CGAACGGGCACGCUGACAAUUU AAGCACUCUGAUUUUGACAAUUACA<br>GGCCGGGACAAGUGCAAUACACCCGGUCGCCACCAUG    | hmAG1   |
| Fig. 2A | -          | -          | -          | miR-21-5p  | miR-17-5p  | GGCCGCUUGAAGUCUUUAAUUAAACCCGCUUGAAGUCUUUAAUUAA<br>ACGAACGGGCACGCUGACAAUUU CAACAUCAGUCUGAUUAGCUACU<br>ACCUGCACUGUAAGCACUUU GCACCCGGUCGCCACCAUG   | hmAG1   |
| Fig. 2A | -          | miR-21-5p  | -          | miR-17-5p  | -          | GGCCGCUUGAAGUCUUUAAUUAAAUCAACAUCAGUCUGAUUAGCUA<br>CGAACGGGCACGCUGACAAUUCCU ACCUGCACUGUAAGCACUUUGA<br>AGCACUCUGAUUUUGACAAUUACACCCGGUCGCCACCAUG   | hmAG1   |
| Fig. 2A | -          | miR-92a-3p | -          | -          | miR-34a-5p | GGCCGCUUGAAGUCUUUAAUUAAAACAGGCCGGGACAAGUGCAAUA<br>CGAACGGGCACGCUGACAAUUU AAGCACUCUGAUUUUGACAAUUACA<br>ACCAGCUAAGACACUGCCACACCCGGUCGCCACCAUG     | hmAG1   |
| Fig. 2A | miR-34a-5p | -          | miR-34a-5p | miR-34a-5p | miR-92a-3p | GGACAACCAGCUAAGACACUGCCACCCGCUUGAAGUCUUUAAUUAAA<br>ACAACCAGCUAAGACACUGCCAGACA ACCAGCUAAGACACUGCCAA<br>CAGGCCGGGACAAGUGCAAUACACCCGGUCGCCACCAUG   | hmAG1   |
| Fig. 2A | -          | -          | miR-17-5p  | -          | miR-34a-5p | GGCCGCUUGAAGUCUUUAAUUAAACCCGCUUGAAGUCUUUAAUUAAA<br>CUACCUGCACUGUAAGCACUUUGGAAGCACUCUGAUUUUGACAAUUA<br>ACAACCAGCUAAGACACUGCCACACCCGGUCGCCACCAUG  | hmAG1   |
| Fig. 2A | -          | miR-17-5p  | miR-34a-5p | -          | miR-34a-5p | GGCCGCUUGAAGUCUUUAAUUAAACUACCUGCACUGUAAGCACUUU<br>GACAACCAGCUAAGACACUGCCAGAAGCACUCUGAUUUUGACAAUUA<br>ACAACCAGCUAAGACACUGCCACACCCGGUCGCCACCAUG   | hmAG1   |
| Fig. 2A | miR-34a-5p | -          | miR-92a-3p | -          | miR-17-5p  | GGACAACCAGCUAAGACACUGCCACCCGCUUGAAGUCUUUAAUUAAA<br>GACAGGCCGGGACAAGUGCAAUAAAGCACUCUGAUUUUGACAAUUAC<br>UACCUGCACUGUAAGCACUUUGCACCCGGUCGCCACCAUG  | hmAG1   |

|         |            |            |            |            |            |                                                                                                                                                 |       |
|---------|------------|------------|------------|------------|------------|-------------------------------------------------------------------------------------------------------------------------------------------------|-------|
| Fig. 2A | miR-34a-5p | miR-92a-3p | -          | miR-34a-5p | miR-17-5p  | GGACAACCAGCUAAGACACUGCCAACAGGCCGGGACAAGUGCAAUA<br>CGAACGGGCACGCUGACAAUUACAACCAGCUAAGACACUGCCACUA<br>CCUGCACUGUAAGCACUUUGCACCCGGUCGCCACCAUG      | hmAG1 |
| Fig. 2A | miR-17-5p  | miR-21-5p  | -          | -          | miR-34a-5p | GGCUACCUGCACUGUAAGCACUUUGUCAACAUCAGUCUGUAUAGCU<br>ACGAACGGGCACGCUGACAAUUUAGCACUCUGAUUUUGACAAUUUAC<br>AACCAGCUAAGACACUGCCACACCCGGUCGCCACCAUG     | hmAG1 |
| Fig. 2A | miR-21-5p  | -          | miR-92a-3p | miR-17-5p  | -          | GGUCAACAUCAGUCUGUAAGCUACCGCUUGAAGUCUUUAAUUAAA<br>GACAGGCCGGGACAAGUGCAAUACUACCUGCACUGUAAGCACUUUG<br>AAGCACUCUGAUUUUGACAAUUACACCCGGUCGCCACCAUG    | hmAG1 |
| Fig. 3A | -          | -          | -          | -          | miR-34a-5p | GGCCGCUUGAAGUCUUUAAUUAAAACCCGCUUGAAGUCUUUAAUUAA<br>ACGAACGGGCACGCUGACAAUUUAGCACUCUGAUUUUGACAAUUUAC<br>AACCAGCUAAGACACUGCCACACCCGGUCGCCACCAUG    | hmAG1 |
| Fig. 3A | -          | -          | -          | miR-34a-5p | -          | GGCCGCUUGAAGUCUUUAAUUAAAACCCGCUUGAAGUCUUUAAUUAA<br>ACGAACGGGCACGCUGACAAUUACAACCAGCUAAGACACUGCCAAA<br>GCACUCUGAUUUUGACAAUUACACCCGGUCGCCACCAUG    | hmAG1 |
| Fig. 3A | -          | -          | miR-34a-5p | -          | -          | GGCCGCUUGAAGUCUUUAAUUAAAACCCGCUUGAAGUCUUUAAUUAAA<br>ACAACCAGCUAAGACACUGCCAGAAGCACUCUGAUUUUGACAAUUAA<br>AGCACUCUGAUUUUGACAAUUACACCCGGUCGCCACCAUG | hmAG1 |
| Fig. 3A | -          | miR-34a-5p | -          | -          | -          | GGCCGCUUGAAGUCUUUAAUUAAAACAACCAGCUAAGACACUGCCA<br>CGAACGGGCACGCUGACAAUUAAGCACUCUGAUUUUGACAAUUACA<br>AGCACUCUGAUUUUGACAAUUACACCCGGUCGCCACCAUG    | hmAG1 |
| Fig. 3A | miR-34a-5p | -          | -          | -          | -          | GGACAACCAGCUAAGACACUGCCACCCGCUUGAAGUCUUUAAUUAAA<br>CGAACGGGCACGCUGACAAUUAAGCACUCUGAUUUUGACAAUUACA<br>AGCACUCUGAUUUUGACAAUUACACCCGGUCGCCACCAUG   | hmAG1 |
| Fig. 3A | -          | -          | -          | miR-34a-5p | miR-34a-5p | GGCCGCUUGAAGUCUUUAAUUAAAACCCGCUUGAAGUCUUUAAUUAA<br>ACGAACGGGCACGCUGACAAUUACAACCAGCUAAGACACUGCCAAC<br>AACCAGCUAAGACACUGCCACACCCGGUCGCCACCAUG     | hmAG1 |
| Fig. 3A | -          | -          | miR-34a-5p | -          | miR-34a-5p | GGCCGCUUGAAGUCUUUAAUUAAAACCCGCUUGAAGUCUUUAAUUAAA<br>ACAACCAGCUAAGACACUGCCAGAAGCACUCUGAUUUUGACAAUUAA<br>CAACCAGCUAAGACACUGCCACACCCGGUCGCCACCAUG  | hmAG1 |
| Fig. 3A | -          | miR-34a-5p | -          | -          | miR-34a-5p | GGCCGCUUGAAGUCUUUAAUUAAAACAACCAGCUAAGACACUGCCA<br>CGAACGGGCACGCUGACAAUUUAGCACUCUGAUUUUGACAAUUACA<br>ACCAGCUAAGACACUGCCACACCCGGUCGCCACCAUG       | hmAG1 |
| Fig. 3A | miR-34a-5p | -          | -          | -          | miR-34a-5p | GGACAACCAGCUAAGACACUGCCACCCGCUUGAAGUCUUUAAUUAAA<br>CGAACGGGCACGCUGACAAUUUAGCACUCUGAUUUUGACAAUUACA<br>ACCAGCUAAGACACUGCCACACCCGGUCGCCACCAUG      | hmAG1 |
| Fig. 3A | -          | -          | miR-34a-5p | miR-34a-5p | -          | GGCCGCUUGAAGUCUUUAAUUAAAACCCGCUUGAAGUCUUUAAUUAAA<br>ACAACCAGCUAAGACACUGCCAGACAACCAGCUAAGACACUGCCAA<br>AGCACUCUGAUUUUGACAAUUACACCCGGUCGCCACCAUG  | hmAG1 |

|         |            |            |            |            |            |                                                                                                                                               |       |
|---------|------------|------------|------------|------------|------------|-----------------------------------------------------------------------------------------------------------------------------------------------|-------|
| Fig. 3A | -          | miR-34a-5p | -          | miR-34a-5p | -          | GGCCGCUUGAAGUCUUUAAUUAAAACAACCAGCUAAGACACUGCCA<br>CGAACGGGCACGCUGACAAUUACAACCAGCUAAGACACUGCCAAAG<br>CACUCUGAUUUUGACAAUUACACCGGUCGCCACCAUG     | hmAG1 |
| Fig. 3A | miR-34a-5p | -          | -          | miR-34a-5p | -          | GGACAACCAGCUAAGACACUGCCACCGCUUGAAGUCUUUAAUUAAA<br>CGAACGGGCACGCUGACAAUUACAACCAGCUAAGACACUGCCAAAG<br>CACUCUGAUUUUGACAAUUACACCGGUCGCCACCAUG     | hmAG1 |
| Fig. 3A | -          | miR-34a-5p | miR-34a-5p | -          | -          | GGCCGCUUGAAGUCUUUAAUUAAAACAACCAGCUAAGACACUGCCA<br>ACAACCAGCUAAGACACUGCCAGAAGCACUCUGAUUUUGACAAUUAA<br>AGCACUCUGAUUUUGACAAUUACACCGGUCGCCACCAUG  | hmAG1 |
| Fig. 3A | miR-34a-5p | -          | miR-34a-5p | -          | -          | GGACAACCAGCUAAGACACUGCCACCGCUUGAAGUCUUUAAUUAAA<br>ACAACCAGCUAAGACACUGCCAGAAGCACUCUGAUUUUGACAAUUAA<br>AGCACUCUGAUUUUGACAAUUACACCGGUCGCCACCAUG  | hmAG1 |
| Fig. 3A | miR-34a-5p | miR-34a-5p | -          | -          | -          | GGACAACCAGCUAAGACACUGCCAACAACCAGCUAAGACACUGCCA<br>CGAACGGGCACGCUGACAAUUACAAGCACUCUGAUUUUGACAAUUACA<br>AGCACUCUGAUUUUGACAAUUACACCGGUCGCCACCAUG | hmAG1 |
| Fig. 3A | -          | miR-34a-5p | -          | miR-34a-5p | miR-34a-5p | GGCCGCUUGAAGUCUUUAAUUAAAACAACCAGCUAAGACACUGCCA<br>CGAACGGGCACGCUGACAAUUACAACCAGCUAAGACACUGCCAACA<br>ACCAGCUAAGACACUGCCACACCGGUCGCCACCAUG      | hmAG1 |
| Fig. 3A | miR-34a-5p | -          | -          | miR-34a-5p | miR-34a-5p | GGACAACCAGCUAAGACACUGCCACCGCUUGAAGUCUUUAAUUAAA<br>CGAACGGGCACGCUGACAAUUACAACCAGCUAAGACACUGCCAACA<br>ACCAGCUAAGACACUGCCACACCGGUCGCCACCAUG      | hmAG1 |
| Fig. 3A | -          | miR-34a-5p | miR-34a-5p | -          | miR-34a-5p | GGCCGCUUGAAGUCUUUAAUUAAAACAACCAGCUAAGACACUGCCA<br>ACAACCAGCUAAGACACUGCCAGAAGCACUCUGAUUUUGACAAUUAA<br>CAACCAGCUAAGACACUGCCACACCGGUCGCCACCAUG   | hmAG1 |
| Fig. 3A | miR-34a-5p | -          | miR-34a-5p | -          | miR-34a-5p | GGACAACCAGCUAAGACACUGCCACCGCUUGAAGUCUUUAAUUAAA<br>ACAACCAGCUAAGACACUGCCAGAAGCACUCUGAUUUUGACAAUUAA<br>CAACCAGCUAAGACACUGCCACACCGGUCGCCACCAUG   | hmAG1 |
| Fig. 3A | miR-34a-5p | miR-34a-5p | -          | -          | miR-34a-5p | GGACAACCAGCUAAGACACUGCCAACAACCAGCUAAGACACUGCCA<br>CGAACGGGCACGCUGACAAUUAAAGCACUCUGAUUUUGACAAUUAACA<br>ACCAGCUAAGACACUGCCACACCGGUCGCCACCAUG    | hmAG1 |
| Fig. 3A | -          | miR-34a-5p | miR-34a-5p | miR-34a-5p | -          | GGCCGCUUGAAGUCUUUAAUUAAAACAACCAGCUAAGACACUGCCA<br>ACAACCAGCUAAGACACUGCCAGACAACCAGCUAAGACACUGCCAA<br>AGCACUCUGAUUUUGACAAUUACACCGGUCGCCACCAUG   | hmAG1 |
| Fig. 3A | miR-34a-5p | -          | miR-34a-5p | miR-34a-5p | -          | GGACAACCAGCUAAGACACUGCCACCGCUUGAAGUCUUUAAUUAAA<br>ACAACCAGCUAAGACACUGCCAGACAACCAGCUAAGACACUGCCAA<br>AGCACUCUGAUUUUGACAAUUACACCGGUCGCCACCAUG   | hmAG1 |
| Fig. 3A | miR-34a-5p | miR-34a-5p | -          | miR-34a-5p | -          | GGACAACCAGCUAAGACACUGCCAACAACCAGCUAAGACACUGCCA<br>CGAACGGGCACGCUGACAAUUACAACCAGCUAAGACACUGCCAAAG<br>CACUCUGAUUUUGACAAUUACACCGGUCGCCACCAUG     | hmAG1 |

|         |           |           |           |           |           |                                                                                                                                                  |       |
|---------|-----------|-----------|-----------|-----------|-----------|--------------------------------------------------------------------------------------------------------------------------------------------------|-------|
| Fig. 3A | -         | -         | -         | -         | miR-17-5p | GGCCGCUUGAAGUCUUUAAUUAAACCCGCUUGAAGUCUUUAAUUAA<br>ACGAACGGGCACGCUGACAAUUC AAGCACUCUGAUUUUGACAAUUAC<br>UACCUGCACUGUAAGCACUUUGCACC GGUCGCCACCAUG   | hmAG1 |
| Fig. 3A | -         | -         | -         | miR-17-5p | -         | GGCCGCUUGAAGUCUUUAAUUAAACCCGCUUGAAGUCUUUAAUUAA<br>ACGAACGGGCACGCUGACAAUUCU ACCUGCACUGUAAGCACUUUG<br>AAGCACUCUGAUUUUGACAAUUACACC GGUCGCCACCAUG    | hmAG1 |
| Fig. 3A | -         | -         | miR-17-5p | -         | -         | GGCCGCUUGAAGUCUUUAAUUAAACCCGCUUGAAGUCUUUAAUUAA<br>ACUACCUGCACUGUAAGCACUUUGAAGCACUCUGAUUUUGACAAUUA<br>AAGCACUCUGAUUUUGACAAUUACACC GGUCGCCACCAUG   | hmAG1 |
| Fig. 3A | -         | miR-17-5p | -         | -         | -         | GGCCGCUUGAAGUCUUUAAUUAAACU ACCUGCACUGUAAGCACUUU<br>GCGAACGGGCACGCUGACAAUUC AAGCACUCUGAUUUUGACAAUUAC<br>AAGCACUCUGAUUUUGACAAUUACACC GGUCGCCACCAUG | hmAG1 |
| Fig. 3A | miR-17-5p | -         | -         | -         | -         | GGCUACCUGCACUGUAAGCACUUUGCCGCUUGAAGUCUUUAAUUAA<br>ACGAACGGGCACGCUGACAAUUC AAGCACUCUGAUUUUGACAAUUAC<br>AAGCACUCUGAUUUUGACAAUUACACC GGUCGCCACCAUG  | hmAG1 |
| Fig. 3A | -         | -         | miR-17-5p | -         | -         | GGCCGCUUGAAGUCUUUAAUUAAACCCGCUUGAAGUCUUUAAUUAAA<br>CUACCUGCACUGUAAGCACUUUGGAAGCACUCUGAUUUUGACAAUUA<br>AAGCACUCUGAUUUUGACAAUUACACC GGUCGCCACCAUG  | hmAG1 |
| Fig. 3A | -         | -         | -         | miR-17-5p | miR-17-5p | GGCCGCUUGAAGUCUUUAAUUAAACCCGCUUGAAGUCUUUAAUUAA<br>ACGAACGGGCACGCUGACAAUUCU ACCUGCACUGUAAGCACUUUGC<br>UACCUGCACUGUAAGCACUUUGCACC GGUCGCCACCAUG    | hmAG1 |
| Fig. 3A | -         | -         | miR-17-5p | -         | miR-17-5p | GGCCGCUUGAAGUCUUUAAUUAAACCCGCUUGAAGUCUUUAAUUAAA<br>CUACCUGCACUGUAAGCACUUUGGAAGCACUCUGAUUUUGACAAUUA<br>CUACCUGCACUGUAAGCACUUUGCACC GGUCGCCACCAUG  | hmAG1 |
| Fig. 3A | -         | miR-17-5p | -         | -         | miR-17-5p | GGCCGCUUGAAGUCUUUAAUUAAACU ACCUGCACUGUAAGCACUUU<br>GCGAACGGGCACGCUGACAAUUC AAGCACUCUGAUUUUGACAAUUAC<br>UACCUGCACUGUAAGCACUUUGCACC GGUCGCCACCAUG  | hmAG1 |
| Fig. 3A | miR-17-5p | -         | -         | -         | miR-17-5p | GGCUACCUGCACUGUAAGCACUUUGCCGCUUGAAGUCUUUAAUUAA<br>ACGAACGGGCACGCUGACAAUUC AAGCACUCUGAUUUUGACAAUUAC<br>UACCUGCACUGUAAGCACUUUGCACC GGUCGCCACCAUG   | hmAG1 |
| Fig. 3A | -         | -         | miR-17-5p | miR-17-5p | -         | GGCCGCUUGAAGUCUUUAAUUAAACCCGCUUGAAGUCUUUAAUUAAA<br>CUACCUGCACUGUAAGCACUUUGGCU ACCUGCACUGUAAGCACUUU<br>GAAGCACUCUGAUUUUGACAAUUACACC GGUCGCCACCAUG | hmAG1 |
| Fig. 3A | -         | miR-17-5p | -         | miR-17-5p | -         | GGCCGCUUGAAGUCUUUAAUUAAACU ACCUGCACUGUAAGCACUUU<br>GCGAACGGGCACGCUGACAAUUCU ACCUGCACUGUAAGCACUUUG<br>AAGCACUCUGAUUUUGACAAUUACACC GGUCGCCACCAUG   | hmAG1 |
| Fig. 3A | miR-17-5p | -         | -         | miR-17-5p | -         | GGCUACCUGCACUGUAAGCACUUUGCCGCUUGAAGUCUUUAAUUAA<br>ACGAACGGGCACGCUGACAAUUCU ACCUGCACUGUAAGCACUUUG<br>AAGCACUCUGAUUUUGACAAUUACACC GGUCGCCACCAUG    | hmAG1 |

|         |           |           |           |           |           |                                                                                                                                                 |       |
|---------|-----------|-----------|-----------|-----------|-----------|-------------------------------------------------------------------------------------------------------------------------------------------------|-------|
| Fig. 3A | -         | miR-17-5p | miR-17-5p | -         | -         | GGCCGCUUGAAGUCUUUAAUUAACCUACCUGCACUGUAAGCACUUU<br>GCUACCUGCACUGUAAGCACUUUGGAAGCACUCUGAUUUUGACAAUU<br>AAAGCACUCUGAUUUUGACAAUUACACCGGUCGCCACCAUG  | hmAG1 |
| Fig. 3A | -         | miR-17-5p | miR-17-5p | -         | -         | GGCCGCUUGAAGUCUUUAAUUAACCUACCUGCACUGUAAGCACUUU<br>GCUACCUGCACUGUAAGCACUUUGGAAGCACUCUGAUUUUGACAAUU<br>AAAGCACUCUGAUUUUGACAAUUACACCGGUCGCCACCAUG  | hmAG1 |
| Fig. 3A | miR-17-5p | miR-17-5p | -         | -         | -         | GGCUACCUGCACUGUAAGCACUUUGCUACCUGCACUGUAAGCACUU<br>UGCGAACGGGCACGCUGACAAUUCAAGCACUCUGAUUUUGACAAUUA<br>CAAGCACUCUGAUUUUGACAAUUACACCGGUCGCCACCAUG  | hmAG1 |
| Fig. 3A | -         | miR-17-5p | -         | miR-17-5p | miR-17-5p | GGCCGCUUGAAGUCUUUAAUUAACCUACCUGCACUGUAAGCACUUU<br>GCGAACGGGCACGCUGACAAUUCUACCUGCACUGUAAGCACUUUGC<br>UACCUGCACUGUAAGCACUUUGCACCGGUCGCCACCAUG     | hmAG1 |
| Fig. 3A | miR-17-5p | -         | -         | miR-17-5p | miR-17-5p | GGCUACCUGCACUGUAAGCACUUUGCCGCUUGAAGUCUUUAAUUA<br>ACGAACGGGCACGCUGACAAUUCUACCUGCACUGUAAGCACUUUGC<br>UACCUGCACUGUAAGCACUUUGCACCGGUCGCCACCAUG      | hmAG1 |
| Fig. 3A | -         | miR-17-5p | miR-17-5p | -         | miR-17-5p | GGCCGCUUGAAGUCUUUAAUUAACCUACCUGCACUGUAAGCACUUU<br>GCUACCUGCACUGUAAGCACUUUGGAAGCACUCUGAUUUUGACAAUU<br>ACUACCUGCACUGUAAGCACUUUGCACCGGUCGCCACCAUG  | hmAG1 |
| Fig. 3A | miR-17-5p | -         | miR-17-5p | -         | miR-17-5p | GGCUACCUGCACUGUAAGCACUUUGCCGCUUGAAGUCUUUAAUUA<br>ACUACCUGCACUGUAAGCACUUUGGAAGCACUCUGAUUUUGACAAUU<br>ACUACCUGCACUGUAAGCACUUUGCACCGGUCGCCACCAUG   | hmAG1 |
| Fig. 3A | miR-17-5p | miR-17-5p | -         | -         | miR-17-5p | GGCUACCUGCACUGUAAGCACUUUGCUCUACCUGCACUGUAAGCACUU<br>UGCGAACGGGCACGCUGACAAUUCAAGCACUCUGAUUUUGACAAUUA<br>CUACCUGCACUGUAAGCACUUUGCACCGGUCGCCACCAUG | hmAG1 |
| Fig. 3A | miR-17-5p | -         | miR-17-5p | miR-17-5p | -         | GGCUACCUGCACUGUAAGCACUUUGCCGCUUGAAGUCUUUAAUUA<br>ACUACCUGCACUGUAAGCACUUUGGCUACCUGCACUGUAAGCACUU<br>UGAAGCACUCUGAUUUUGACAAUUACACCGGUCGCCACCAUG   | hmAG1 |
| Fig. 3A | miR-17-5p | -         | miR-17-5p | miR-17-5p | -         | GGCUACCUGCACUGUAAGCACUUUGCCGCUUGAAGUCUUUAAUUA<br>ACUACCUGCACUGUAAGCACUUUGGCUACCUGCACUGUAAGCACUU<br>UGAAGCACUCUGAUUUUGACAAUUACACCGGUCGCCACCAUG   | hmAG1 |
| Fig. 3A | miR-17-5p | miR-17-5p | -         | miR-17-5p | -         | GGCUACCUGCACUGUAAGCACUUUGCUCUACCUGCACUGUAAGCACUU<br>UGCGAACGGGCACGCUGACAAUUCUACCUGCACUGUAAGCACUUU<br>GAAGCACUCUGAUUUUGACAAUUACACCGGUCGCCACCAUG  | hmAG1 |
| Fig. 3A | -         | -         | -         | -         | miR-21-5p | GGCCGCUUGAAGUCUUUAAUUAACCCGCUUGAAGUCUUUAAUUA<br>ACGAACGGGCACGCUGACAAUUAAGCACUCUGAUUUUGACAAUUAUC<br>AACAUCAUCUGUAAGCUACACCGGUCGCCACCAUG          | hmAG1 |
| Fig. 3A | -         | -         | -         | miR-21-5p | -         | GGCCGCUUGAAGUCUUUAAUUAACCCGCUUGAAGUCUUUAAUUA<br>ACGAACGGGCACGCUGACAAUUCUACAUCAUCUGUAAGCUAAA<br>GCACUCUGAUUUUGACAAUUACACCGGUCGCCACCAUG           | hmAG1 |



|         |           |           |           |           |           |                                                                                                                                                |       |
|---------|-----------|-----------|-----------|-----------|-----------|------------------------------------------------------------------------------------------------------------------------------------------------|-------|
| Fig. 3A | -         | -         | miR-21-5p | -         | -         | GGCCGCUUGAAGUCUUUAAUUAAAACCGCUUGAAGUCUUUAAUUAAA<br>UCAACAUCAGUCUGAUAAAGCUAGAAGCACUCUGAUUUUGACAAUUAA<br>AGCACUCUGAUUUUGACAAUUACACCGGUCGCCACCAUG | hmAG1 |
| Fig. 3A | -         | miR-21-5p | -         | -         | -         | GGCCGCUUGAAGUCUUUAAUUAAAUCAACAUCAGUCUGAUAAAGCUA<br>CGAACGGGCACGCUGACAAUUCAAGCACUCUGAUUUUGACAAUUACA<br>AGCACUCUGAUUUUGACAAUUACACCGGUCGCCACCAUG  | hmAG1 |
| Fig. 3A | miR-21-5p | -         | -         | -         | -         | GGUCAACAUCAGUCUGAUAAAGCUACCGCUUGAAGUCUUUAAUUAAA<br>CGAACGGGCACGCUGACAAUUCAAGCACUCUGAUUUUGACAAUUACA<br>AGCACUCUGAUUUUGACAAUUACACCGGUCGCCACCAUG  | hmAG1 |
| Fig. 3A | -         | -         | -         | miR-21-5p | miR-21-5p | GGCCGCUUGAAGUCUUUAAUUAAAACCGCUUGAAGUCUUUAAUUAAA<br>ACGAACGGGCACGCUGACAAUUUCAACAUCAGUCUGAUAAAGCUAUC<br>AACAUCAGUCUGAUAAAGCUACACCGGUCGCCACCAUG   | hmAG1 |
| Fig. 3A | -         | -         | miR-21-5p | -         | miR-21-5p | GGCCGCUUGAAGUCUUUAAUUAAAACCGCUUGAAGUCUUUAAUUAAA<br>UCAACAUCAGUCUGAUAAAGCUAGAAGCACUCUGAUUUUGACAAUUAA<br>CAACAUCAGUCUGAUAAAGCUACACCGGUCGCCACCAUG | hmAG1 |
| Fig. 3A | -         | miR-21-5p | -         | -         | miR-21-5p | GGCCGCUUGAAGUCUUUAAUUAAAUCAACAUCAGUCUGAUAAAGCUA<br>CGAACGGGCACGCUGACAAUUAAAGCACUCUGAUUUUGACAAUUUCA<br>ACAUCAGUCUGAUAAAGCUACACCGGUCGCCACCAUG    | hmAG1 |
| Fig. 3A | miR-21-5p | -         | -         | -         | miR-21-5p | GGUCAACAUCAGUCUGAUAAAGCUACCGCUUGAAGUCUUUAAUUAAA<br>CGAACGGGCACGCUGACAAUUAAAGCACUCUGAUUUUGACAAUUUCA<br>ACAUCAGUCUGAUAAAGCUACACCGGUCGCCACCAUG    | hmAG1 |
| Fig. 3A | -         | -         | miR-21-5p | miR-21-5p | -         | GGCCGCUUGAAGUCUUUAAUUAAAACCGCUUGAAGUCUUUAAUUAAA<br>UCAACAUCAGUCUGAUAAAGCUAGUCAACAUCAGUCUGAUAAAGCUAA<br>AGCACUCUGAUUUUGACAAUUACACCGGUCGCCACCAUG | hmAG1 |
| Fig. 3A | -         | miR-21-5p | -         | miR-21-5p | -         | GGCCGCUUGAAGUCUUUAAUUAAAUCAACAUCAGUCUGAUAAAGCUA<br>CGAACGGGCACGCUGACAAUUUCAACAUCAGUCUGAUAAAGCUAAAAG<br>CACUCUGAUUUUGACAAUUACACCGGUCGCCACCAUG   | hmAG1 |
| Fig. 3A | miR-21-5p | -         | -         | miR-21-5p | -         | GGUCAACAUCAGUCUGAUAAAGCUACCGCUUGAAGUCUUUAAUUAAA<br>CGAACGGGCACGCUGACAAUUUCAACAUCAGUCUGAUAAAGCUAAAAG<br>CACUCUGAUUUUGACAAUUACACCGGUCGCCACCAUG   | hmAG1 |
| Fig. 3A | -         | miR-21-5p | miR-21-5p | -         | -         | GGCCGCUUGAAGUCUUUAAUUAAAUCAACAUCAGUCUGAUAAAGCUA<br>UCAACAUCAGUCUGAUAAAGCUAGAAGCACUCUGAUUUUGACAAUUAA<br>AGCACUCUGAUUUUGACAAUUACACCGGUCGCCACCAUG | hmAG1 |
| Fig. 3A | miR-21-5p | -         | miR-21-5p | -         | -         | GGUCAACAUCAGUCUGAUAAAGCUACCGCUUGAAGUCUUUAAUUAAA<br>UCAACAUCAGUCUGAUAAAGCUAGAAGCACUCUGAUUUUGACAAUUAA<br>AGCACUCUGAUUUUGACAAUUACACCGGUCGCCACCAUG | hmAG1 |
| Fig. 3A | miR-21-5p | miR-21-5p | -         | -         | -         | GGUCAACAUCAGUCUGAUAAAGCUAACAACAUCAGUCUGAUAAAGCUA<br>CGAACGGGCACGCUGACAAUUCAAGCACUCUGAUUUUGACAAUUACA<br>AGCACUCUGAUUUUGACAAUUACACCGGUCGCCACCAUG | hmAG1 |

|         |            |            |            |            |            |                                                                                                                                                |       |
|---------|------------|------------|------------|------------|------------|------------------------------------------------------------------------------------------------------------------------------------------------|-------|
| Fig. 3A | -          | miR-21-5p  | -          | miR-21-5p  | miR-21-5p  | GGCCGCUUGAAGUCUUUAAUUAAAUCAACAUCAGUCUGAUAAGCUA<br>CGAACGGGCACGCUGACAAUUUCAACAUCAGUCUGAUAAGCUAUA<br>ACAUCAGUCUGAUAAGCUACACCGGUCGCCACCAUG        | hmAG1 |
| Fig. 3A | miR-21-5p  | -          | -          | miR-21-5p  | miR-21-5p  | GGUCAACAUCAGUCUGAUAAGCUACCGCUUGAAGUCUUUAAUUAAA<br>CGAACGGGCACGCUGACAAUUUCAACAUCAGUCUGAUAAGCUAUA<br>ACAUCAGUCUGAUAAGCUACACCGGUCGCCACCAUG        | hmAG1 |
| Fig. 3A | -          | miR-21-5p  | miR-21-5p  | -          | miR-21-5p  | GGCCGCUUGAAGUCUUUAAUUAAAUCAACAUCAGUCUGAUAAGCUA<br>UCAACAUCAGUCUGAUAAGCUAGAAGCACUCUGAUUUUGACAAUUUA<br>CAACAUCAGUCUGAUAAGCUACACCGGUCGCCACCAUG    | hmAG1 |
| Fig. 3A | miR-21-5p  | -          | miR-21-5p  | -          | miR-21-5p  | GGUCAACAUCAGUCUGAUAAGCUACCGCUUGAAGUCUUUAAUUAAA<br>UCAACAUCAGUCUGAUAAGCUAGAAGCACUCUGAUUUUGACAAUUUA<br>CAACAUCAGUCUGAUAAGCUACACCGGUCGCCACCAUG    | hmAG1 |
| Fig. 3A | miR-21-5p  | miR-21-5p  | -          | -          | miR-21-5p  | GGUCAACAUCAGUCUGAUAAGCUAUAACAUCAGUCUGAUAAGCUA<br>CGAACGGGCACGCUGACAAUUAAAGCACUCUGAUUUUGACAAUUUA<br>ACAUCAGUCUGAUAAGCUACACCGGUCGCCACCAUG        | hmAG1 |
| Fig. 3A | -          | miR-21-5p  | miR-21-5p  | miR-21-5p  | -          | GGCCGCUUGAAGUCUUUAAUUAAAUCAACAUCAGUCUGAUAAGCUA<br>UCAACAUCAGUCUGAUAAGCUAGUCAACAUCAGUCUGAUAAGCUAA<br>AGCACUCUGAUUUUGACAAUUACACCGGUCGCCACCAUG    | hmAG1 |
| Fig. 3A | miR-21-5p  | -          | miR-21-5p  | miR-21-5p  | -          | GGUCAACAUCAGUCUGAUAAGCUACCGCUUGAAGUCUUUAAUUAAA<br>UCAACAUCAGUCUGAUAAGCUAGUCAACAUCAGUCUGAUAAGCUAA<br>AGCACUCUGAUUUUGACAAUUACACCGGUCGCCACCAUG    | hmAG1 |
| Fig. 3A | miR-21-5p  | miR-21-5p  | -          | miR-21-5p  | -          | GGUCAACAUCAGUCUGAUAAGCUAUAACAUCAGUCUGAUAAGCUA<br>CGAACGGGCACGCUGACAAUUUCAACAUCAGUCUGAUAAGCUAAA<br>CACUCUGAUUUUGACAAUUACACCGGUCGCCACCAUG        | hmAG1 |
| Fig. 3A | -          | -          | -          | -          | miR-92a-3p | GGCCGCUUGAAGUCUUUAAUUAAAACCCGCUUGAAGUCUUUAAUUAA<br>ACGAACGGGCACGCUGACAAUUAAAGCACUCUGAUUUUGACAAUUAA<br>AGGCCGGGACAAGUGCAAUACACCGGUCGCCACCAUG    | hmAG1 |
| Fig. 3A | -          | -          | -          | miR-92a-3p | -          | GGCCGCUUGAAGUCUUUAAUUAAAACCCGCUUGAAGUCUUUAAUUAA<br>ACGAACGGGCACGCUGACAAUUACAGGCCGGGACAAGUGCAAUAAA<br>GCACUCUGAUUUUGACAAUUACACCGGUCGCCACCAUG    | hmAG1 |
| Fig. 3A | -          | -          | miR-92a-3p | -          | -          | GGCCGCUUGAAGUCUUUAAUUAAAACCCGCUUGAAGUCUUUAAUUAA<br>AACAGGCCGGGACAAGUGCAAUAAAAGCACUCUGAUUUUGACAAUUAA<br>AGCACUCUGAUUUUGACAAUUACACCGGUCGCCACCAUG | hmAG1 |
| Fig. 3A | -          | miR-92a-3p | -          | -          | -          | GGCCGCUUGAAGUCUUUAAUUAAAACAGGCCGGGACAAGUGCAAUA<br>CGAACGGGCACGCUGACAAUUCAAGCACUCUGAUUUUGACAAUUACA<br>AGCACUCUGAUUUUGACAAUUACACCGGUCGCCACCAUG   | hmAG1 |
| Fig. 3A | miR-92a-3p | -          | -          | -          | -          | GGACAGGCCGGGACAAGUGCAAUACCGCUUGAAGUCUUUAAUUAAA<br>CGAACGGGCACGCUGACAAUUCAAGCACUCUGAUUUUGACAAUUACA<br>AGCACUCUGAUUUUGACAAUUACACCGGUCGCCACCAUG   | hmAG1 |

|         |            |            |            |            |            |                                                                                                                                                  |       |
|---------|------------|------------|------------|------------|------------|--------------------------------------------------------------------------------------------------------------------------------------------------|-------|
| Fig. 3A | -          | -          | miR-92a-3p | -          | -          | GGCCGCUUGAAGUCUUUAAUUAACCGCUUGAAGUCUUUAAUUA<br>GACAGGCCGGGACAAGUGCAAUAAAGCACUCUGAUUUUGACAAUUA<br>AGCACUCUGAUUUUGACAAUUAACACCGGUCGCCACCAUG        | hmAG1 |
| Fig. 3A | -          | -          | -          | miR-92a-3p | miR-92a-3p | GGCCGCUUGAAGUCUUUAAUUAACCGCUUGAAGUCUUUAAUUA<br>ACGAACGGGCACGCUGACAAUUAACAGGCCGGGACAAGUGCAAUAAC<br>AGGCCGGGACAAGUGCAAUACACCGGUCGCCACCAUG          | hmAG1 |
| Fig. 3A | -          | -          | miR-92a-3p | -          | miR-92a-3p | GGCCGCUUGAAGUCUUUAAUUAACCGCUUGAAGUCUUUAAUUA<br>GACAGGCCGGGACAAGUGCAAUAAAGCACUCUGAUUUUGACAAUUA<br>CAGGCCGGGACAAGUGCAAUACACCGGUCGCCACCAUG          | hmAG1 |
| Fig. 3A | -          | miR-92a-3p | -          | -          | miR-92a-3p | GGCCGCUUGAAGUCUUUAAUUAACAGGCCGGGACAAGUGCAAUA<br>CGAACGGGCACGCUGACAAUUAAGCACUCUGAUUUUGACAAUUAACA<br>GGCCGGGACAAGUGCAAUACACCGGUCGCCACCAUG          | hmAG1 |
| Fig. 3A | miR-92a-3p | -          | -          | -          | miR-92a-3p | GGACAGGCCGGGACAAGUGCAAUACCGCUUGAAGUCUUUAAUUA<br>CGAACGGGCACGCUGACAAUUAAGCACUCUGAUUUUGACAAUUAACA<br>GGCCGGGACAAGUGCAAUACACCGGUCGCCACCAUG          | hmAG1 |
| Fig. 3A | -          | -          | miR-92a-3p | miR-92a-3p | -          | GGCCGCUUGAAGUCUUUAAUUAACCGCUUGAAGUCUUUAAUUA<br>GACAGGCCGGGACAAGUGCAAUAAAGGCCGGGACAAGUGCAAUUA<br>AGCACUCUGAUUUUGACAAUUAACACCGGUCGCCACCAUG         | hmAG1 |
| Fig. 3A | -          | miR-92a-3p | -          | miR-92a-3p | -          | GGCCGCUUGAAGUCUUUAAUUAACAGGCCGGGACAAGUGCAAUA<br>CGAACGGGCACGCUGACAAUUAACAGGCCGGGACAAGUGCAAUAAAG<br>CACUCUGAUUUUGACAAUUAACACCGGUCGCCACCAUG        | hmAG1 |
| Fig. 3A | miR-92a-3p | -          | -          | miR-92a-3p | -          | GGACAGGCCGGGACAAGUGCAAUACCGCUUGAAGUCUUUAAUUA<br>CGAACGGGCACGCUGACAAUUAACAGGCCGGGACAAGUGCAAUAAAG<br>CACUCUGAUUUUGACAAUUAACACCGGUCGCCACCAUG        | hmAG1 |
| Fig. 3A | -          | miR-92a-3p | miR-92a-3p | -          | -          | GGCCGCUUGAAGUCUUUAAUUAACAGGCCGGGACAAGUGCAAUA<br>GACAGGCCGGGACAAGUGCAAUAAAGCACUCUGAUUUUGACAAUUA<br>AGCACUCUGAUUUUGACAAUUAACACCGGUCGCCACCAUG       | hmAG1 |
| Fig. 3A | miR-92a-3p | -          | miR-92a-3p | -          | -          | GGACAGGCCGGGACAAGUGCAAUACCGCUUGAAGUCUUUAAUUA<br>GACAGGCCGGGACAAGUGCAAUAAAGCACUCUGAUUUUGACAAUUA<br>AGCACUCUGAUUUUGACAAUUAACACCGGUCGCCACCAUG       | hmAG1 |
| Fig. 3A | miR-92a-3p | miR-92a-3p | -          | -          | -          | GGACAGGCCGGGACAAGUGCAAUAAAGCACUCUGAUUUUGACAAUUA<br>CGAACGGGCACGCUGACAAUUAACAGCACUCUGAUUUUGACAAUUAACA<br>AGCACUCUGAUUUUGACAAUUAACACCGGUCGCCACCAUG | hmAG1 |
| Fig. 3A | -          | miR-92a-3p | -          | miR-92a-3p | miR-92a-3p | GGCCGCUUGAAGUCUUUAAUUAACAGGCCGGGACAAGUGCAAUA<br>CGAACGGGCACGCUGACAAUUAACAGGCCGGGACAAGUGCAAUUAACA<br>GGCCGGGACAAGUGCAAUACACCGGUCGCCACCAUG         | hmAG1 |
| Fig. 3A | miR-92a-3p | -          | -          | miR-92a-3p | miR-92a-3p | GGACAGGCCGGGACAAGUGCAAUACCGCUUGAAGUCUUUAAUUA<br>CGAACGGGCACGCUGACAAUUAACAGGCCGGGACAAGUGCAAUUAACA<br>AGCACUCUGAUUUUGACAAUUAACACCGGUCGCCACCAUG     | hmAG1 |

|         |             |             |             |             |             |                                                                                                                                                  |        |
|---------|-------------|-------------|-------------|-------------|-------------|--------------------------------------------------------------------------------------------------------------------------------------------------|--------|
| Fig. 3A | -           | miR-92a-3p  | miR-92a-3p  | -           | miR-92a-3p  | GGCCGCUUGAAGUCUUUAAUUAACAGGCCGGGACAAGUGCAAUA<br>GACAGGCCGGGACAAGUGCAAUAAAGCACUCUGAUUUUGACAAUUA<br>CAGGCCGGGACAAGUGCAAUACACCGGUCGCCACCAUG         | hmAG1  |
| Fig. 3A | miR-92a-3p  | -           | miR-92a-3p  | -           | miR-92a-3p  | GGACAGGCCGGGACAAGUGCAAUACCGCUUGAAGUCUUUAAUUA<br>GACAGGCCGGGACAAGUGCAAUAAAGCACUCUGAUUUUGACAAUUA<br>CAGGCCGGGACAAGUGCAAUACACCGGUCGCCACCAUG         | hmAG1  |
| Fig. 3A | miR-92a-3p  | miR-92a-3p  | -           | -           | miR-92a-3p  | GGACAGGCCGGGACAAGUGCAAUAAACAGGCCGGGACAAGUGCAAUA<br>CGAACGGGCACGCUGACAAUUAAGCACUCUGAUUUUGACAAUUAACA<br>GGCCGGGACAAGUGCAAUACACCGGUCGCCACCAUG       | hmAG1  |
| Fig. 3A | -           | miR-92a-3p  | miR-92a-3p  | miR-92a-3p  | -           | GGCCGCUUGAAGUCUUUAAUUAACAGGCCGGGACAAGUGCAAUA<br>GACAGGCCGGGACAAGUGCAAUAAACAGGCCGGGACAAGUGCAAUA<br>AGCACUCUGAUUUUGACAAUUAACACCGGUCGCCACCAUG       | hmAG1  |
| Fig. 3A | miR-92a-3p  | -           | miR-92a-3p  | miR-92a-3p  | -           | GGACAGGCCGGGACAAGUGCAAUACCGCUUGAAGUCUUUAAUUA<br>GACAGGCCGGGACAAGUGCAAUAAACAGGCCGGGACAAGUGCAAUA<br>AGCACUCUGAUUUUGACAAUUAACACCGGUCGCCACCAUG       | hmAG1  |
| Fig. 3A | miR-92a-3p  | miR-92a-3p  | -           | miR-92a-3p  | -           | GGACAGGCCGGGACAAGUGCAAUAAACAGGCCGGGACAAGUGCAAUA<br>CGAACGGGCACGCUGACAAUUAAGCACUCUGAUUUUGACAAUUAAG<br>CACUCUGAUUUUGACAAUUAACACCGGUCGCCACCAUG      | hmAG1  |
| Fig. 4E | miR-4510    | miR-199a-5p | -           | -           | let-7i-5p   | GGAACCAUACAUCUACUCCUCAGAACAGGUAGUCUGAACACUGG<br>GCGAACGGGCACGCUGACAAUUAAGCACUCUGAUUUUGACAAUUA<br>CAGCACAAACUACUACCUCACACCGGUCGCCACCAUG           | hmAG1  |
| Fig. 4E | miR-135a-5p | miR-135a-5p | miR-302a-5p | miR-135a-5p | miR-135a-5p | GGUCACAUAGGAAUAAAAAGCCAUUACACAUAGGAAUAAAAAGCCA<br>UAAGCAAGUACAUCACGUAUUAAGUGUCACAUAGGAAUAAAAAGCC<br>AUUACACAUAGGAAUAAAAAGCCAUUACACCGGUCGCCACCAUG | hmKO2  |
| Fig. 4E | miR-302a-5p | miR-199a-5p | miR-199a-5p | miR-302a-5p | miR-199a-5p | GGAGCAAGUACAUCACGUAUUAAGUGAACAGGUAGUCUGAACACUG<br>GGGAACAGGUAGUCUGAACACUGGGACAGCAAGUACAUCACGUAU<br>AAGUGAACAGGUAGUCUGAACACUGGGCACCGGUCGCCACCAUG  | tagBFP |
| Fig. 4E | miR-200b-3p | miR-200b-3p | miR-200b-3p | miR-200b-3p | miR-200b-3p | GGUCAUCAUACCAGGCAGUAUUAUCAUCAUACCAGGCAGUAUUA<br>UCAUCAUACCAGGCAGUAUUAAGUAUCAUCAUACCAGGCAGUAUUA<br>UCAUCAUACCAGGCAGUAUUAACACCGGUCGCCACCAUG        | hdKRed |
| Fig. 5E | -           | miR-367-3p  | -           | -           | miR-302a-5p | GGCCGCUUGAAGUCUUUAAUUAACACCAUUGCUAAGUGCAAUU<br>CGAACGGGCACGCUGACAAUUAAGCACUCUGAUUUUGACAAUUAAGC<br>AAGUACAUCACGUAUUAAGUCACCGGUCGCCACCAUG          | hmAG1  |
| Fig. 5E | -           | miR-27a-3p  | -           | miR-27a-3p  | miR-27a-3p  | GGCCGCUUGAAGUCUUUAAUUAAGCGGAACUAGCCACUGUGAAA<br>CGAACGGGCACGCUGACAAUUAAGCACUCUGAUUUUGACAAUUAAGC<br>GAACUUAAGCCACUGUGAAACACCGGUCGCCACCAUG         | hmKO2  |
| Fig. 5E | miR-20a-5p  | miR-367-3p  | miR-373-3p  | miR-27a-3p  | miR-143-3p  | GGCUACCUGCACUAUAAAGCACUUUAUCACCAUUGCUAAGUGCAAU<br>UACACCCCAAAAUCGAAGCACUUCGCGGAACUUAAGCCACUGUGAAG<br>AGCUACAGUCUUAUCUCACACCGGUCGCCACCAUG         | tagBFP |

|         |           |   |           |           |   |                                                                                                                                               |        |
|---------|-----------|---|-----------|-----------|---|-----------------------------------------------------------------------------------------------------------------------------------------------|--------|
| Fig. 5E | miR-17-5p | - | miR-93-5p | miR-17-5p | - | GGCUACCUGCACUGUAAGCACUUUGCCGCUUGAAGUCUUUAAUUAA<br>ACUACCUGCACGAACAGCACUUUGCUACCUGCACUGUAAGCACUUU<br>GAAGCACUCUGAUUUUGACAAUUACACCGGUCGCCACCAUG | hdKRed |
|---------|-----------|---|-----------|-----------|---|-----------------------------------------------------------------------------------------------------------------------------------------------|--------|

\*<sup>1</sup> The first G is the transcription start site where an anti-reverse cap analog is incorporated. The last AUG is the start codon of the reporter fluorescent protein.

**Table S2. 5'UTR sequences of the single-slot mRNAs used in this study.**

| Transfection | miRNA           | miRBase ID   | 5' UTR sequence* <sup>1,2</sup>                                     | Protein |
|--------------|-----------------|--------------|---------------------------------------------------------------------|---------|
| 7            | hsa-miR-214-3p  | MIMAT0000271 | GGUUCCGCGAUCGCGGAUCCACUGCCUGUCUGGCCUGCUGUAGAUCACACCCGGUCGCCACCAUG   | hmAG1   |
| 8            | hsa-miR-127-3p  | MIMAT0000446 | GGUUCCGCGAUCGCGGAUCCAGCCAAGCUCAGACGGAUCCGAAGAUCACACCCGGUCGCCACCAUG  | hmAG1   |
| 9            | hsa-miR-92a-3p  | MIMAT0000092 | GGUUCCGCGAUCGCGGAUCCACAGGCCGGGACAAGUGCAAUAAGAUCACACCCGGUCGCCACCAUG  | hmAG1   |
| 10           | hsa-miR-339-5p  | MIMAT0000764 | GGUUCCGCGAUCGCGGAUCCCGUGAGCUCUGGAGGACAGGGAAGAUCACACCCGGUCGCCACCAUG  | hmAG1   |
| 11           | hsa-miR-133a    | MIMAT0000427 | GGUUCCGCGAUCGCGGAUCCCAGCUGGUUGAAGGGGACAAAAGAUCACACCCGGUCGCCACCAUG   | hmAG1   |
| 12           | hsa-miR-17-3p   | MIMAT0000071 | GGUUCCGCGAUCGCGGAUCCCUACAAGUGCCUUCACUGCAGUAGAUCACACCCGGUCGCCACCAUG  | hmAG1   |
| 13           | hsa-miR-1       | MIMAT0000416 | GGUUCCGCGAUCGCGGAUCCAUACAUAUCUUCUUACAUAUCCAAGAUCACACCCGGUCGCCACCAUG | hmAG1   |
| 14           | hsa-miR-206     | MIMAT0000462 | GGUUCCGCGAUCGCGGAUCCCCACACACUCCUUAUAUCCAAGAUCACACCCGGUCGCCACCAUG    | hmAG1   |
| 15           | hsa-miR-197-3p  | MIMAT0000227 | GGUUCCGCGAUCGCGGAUCCCGUGGGUGGAGAAGGUGGUGAAAGAUCACACCCGGUCGCCACCAUG  | hmAG1   |
| 16           | hsa-miR-224-5p  | MIMAT0000281 | GGUUCCGCGAUCGCGGAUCCAACGGAACCACUAGUGACUUGAGAUAACACCCGGUCGCCACCAUG   | hmAG1   |
| 17           | hsa-miR-365a-3p | MIMAT0000710 | GGUUCCGCGAUCGCGGAUCCAUAAAGGAUUUUAGGGGCAUUAAGAUCACACCCGGUCGCCACCAUG  | hmAG1   |
| 18           | hsa-miR-183-5p  | MIMAT0000261 | GGUUCCGCGAUCGCGGAUCCAGUGAAUUCUACCAGUGCCAUAAGAUCACACCCGGUCGCCACCAUG  | hmAG1   |
| 19           | hsa-miR-331-3p  | MIMAT0000760 | GGUUCCGCGAUCGCGGAUCCUUCUAGGAUAGGCCAGGGGCAGAUCAACACCCGGUCGCCACCAUG   | hmAG1   |
| 20           | hsa-miR-203a    | MIMAT0000264 | GGUUCCGCGAUCGCGGAUCCUAGUGGUCCUAAACAUAUUCACAGAUCACACCCGGUCGCCACCAUG  | hmAG1   |
| 21           | hsa-miR-367-3p  | MIMAT0000719 | GGUUCCGCGAUCGCGGAUCCUCACCAUUGCUAAAAGUGCAAUAAGAUCACACCCGGUCGCCACCAUG | hmAG1   |
| 22           | hsa-miR-373-5p  | MIMAT0000725 | GGUUCCGCGAUCGCGGAUCCGAAAGCGCCCCAUUUUGAGUAGAUCACACCCGGUCGCCACCAUG    | hmAG1   |
| 23           | hsa-miR-484     | MIMAT0002174 | GGUUCCGCGAUCGCGGAUCCAUCCGGAGGGGACUGAGCCUGAAGAUCACACCCGGUCGCCACCAUG  | hmAG1   |
| 24           | hsa-miR-199a-5p | MIMAT0000231 | GGUUCCGCGAUCGCGGAUCCGAACAGGUAGUCUGAACACUGGGAGAUCACACCCGGUCGCCACCAUG | hmAG1   |
| 25           | hsa-miR-370     | MIMAT0000722 | GGUUCCGCGAUCGCGGAUCCACCAGGUUCCACCCCAGCAGGCAGAUCAACACCCGGUCGCCACCAUG | hmAG1   |
| 26           | hsa-miR-382-5p  | MIMAT0000737 | GGUUCCGCGAUCGCGGAUCCCGAAUCCACCACGAACAACUUCAGAUCACACCCGGUCGCCACCAUG  | hmAG1   |
| 27           | hsa-miR-328     | MIMAT0000752 | GGUUCCGCGAUCGCGGAUCCACGGAAGGGCAGAGAGGGCCAGAGAUCACACCCGGUCGCCACCAUG  | hmAG1   |
| 28           | hsa-miR-361-5p  | MIMAT0000703 | GGUUCCGCGAUCGCGGAUCCGUACCCUUGGAGAUUCUGAUAAAGAUCACACCCGGUCGCCACCAUG  | hmAG1   |
| 29           | hsa-miR-486-5p  | MIMAT0002177 | GGUUCCGCGAUCGCGGAUCCUCGGGGCAGCUCAGUACAGGAAGAUCACACCCGGUCGCCACCAUG   | hmAG1   |
| 30           | hsa-miR-450a-5p | MIMAT0001545 | GGUUCCGCGAUCGCGGAUCCAUUAUAGGAACACAUCGAAAAAGAUCACACCCGGUCGCCACCAUG   | hmAG1   |
| 31           | hsa-miR-7-5p    | MIMAT0000252 | GGUUCCGCGAUCGCGGAUCCACAACAAAUCACUAGUCUCCAAGAUCACACCCGGUCGCCACCAUG   | hmAG1   |
| 32           | hsa-miR-187-3p  | MIMAT0000262 | GGUUCCGCGAUCGCGGAUCCCGGCUGCAACACAAGACACGAAGAUCACACCCGGUCGCCACCAUG   | hmAG1   |
| 33           | hsa-miR-505-3p  | MIMAT0002876 | GGUUCCGCGAUCGCGGAUCCAGGAAACCAGCAAGUGUAGCAGAGAUCACACCCGGUCGCCACCAUG  | hmAG1   |
| 34           | hsa-miR-182-5p  | MIMAT0000259 | GGUUCCGCGAUCGCGGAUCCAGUGAGUUCUACCAUUGCCAAAGAUCACACCCGGUCGCCACCAUG   | hmAG1   |
| 35           | hsa-miR-99a-5p  | MIMAT0000097 | GGUUCCGCGAUCGCGGAUCCCACAAGAUCGGAUCUACGGUUAGAUCACACCCGGUCGCCACCAUG   | hmAG1   |
| 36           | hsa-miR-100-5p  | MIMAT0000098 | GGUUCCGCGAUCGCGGAUCCCACAAGUUCGGAUCUACGGUUAGAUCACACCCGGUCGCCACCAUG   | hmAG1   |
| 37           | hsa-let-7a-5p   | MIMAT0000062 | GGUUCCGCGAUCGCGGAUCCAACUAUACAACCUACUACCUCAAGAUCACACCCGGUCGCCACCAUG  | hmAG1   |
| 38           | hsa-miR-191-5p  | MIMAT0000440 | GGUUCCGCGAUCGCGGAUCCAGCUGCUUUUGGGAUCCGUUGAGAUCACACCCGGUCGCCACCAUG   | hmAG1   |

|    |                 |              |                                                                     |       |
|----|-----------------|--------------|---------------------------------------------------------------------|-------|
| 39 | hsa-miR-19a-3p  | MIMAT0000073 | GGUUCGCGAUCGCGGAUCCUCAGUUUUGCAUAGAUUUGCACAAGAUCACCAGGUCGCCACCAUG    | hmAG1 |
| 40 | hsa-miR-99b-5p  | MIMAT0000689 | GGUUCGCGAUCGCGGAUCCCGCAAGGUCGGUUCUACGGGUGAGAUACACCAGGUCGCCACCAUG    | hmAG1 |
| 41 | hsa-miR-193b-3p | MIMAT0002819 | GGUUCGCGAUCGCGGAUCCAGCGGGACUUUGAGGGCCAGUUAGAUACACCAGGUCGCCACCAUG    | hmAG1 |
| 42 | hsa-miR-342-3p  | MIMAT0000753 | GGUUCGCGAUCGCGGAUCCACGGGUGCGAUUUCUGUGAGAGAAGAUCCACCAGGUCGCCACCAUG   | hmAG1 |
| 43 | hsa-miR-320a    | MIMAT0000510 | GGUUCGCGAUCGCGGAUCCUCGCCUCUCAACCCAGCUUUUAGAUACACCAGGUCGCCACCAUG     | hmAG1 |
| 44 | hsa-miR-34a-5p  | MIMAT0000255 | GGUUCGCGAUCGCGGAUCCACAACCAGCUAAGACACUGCCAAGAUCACCAGGUCGCCACCAUG     | hmAG1 |
| 45 | hsa-miR-22-3p   | MIMAT0000077 | GGUUCGCGAUCGCGGAUCCACAGUUCUUAACUGGCAGCUUAGAUACACCAGGUCGCCACCAUG     | hmAG1 |
| 46 | hsa-miR-10a-5p  | MIMAT0000253 | GGUUCGCGAUCGCGGAUCCCAAAAUUCGGAUCUACAGGGUAAGAUCACCAGGUCGCCACCAUG     | hmAG1 |
| 47 | hsa-miR-423-3p  | MIMAT0001340 | GGUUCGCGAUCGCGGAUCCACUGAGGGGCCUCAGACCGAGCUAGAUCACCAGGUCGCCACCAUG    | hmAG1 |
| 48 | hsa-miR-30a-3p  | MIMAT0000088 | GGUUCGCGAUCGCGGAUCCGCUGCAAACUCCGACUGAAAGAGAUACACCAGGUCGCCACCAUG     | hmAG1 |
| 49 | hsa-miR-151a-3p | MIMAT0000757 | GGUUCGCGAUCGCGGAUCCCUCAAGGAGCUUCAGUCUAGAGAUC AACACCAGGUCGCCACCAUG   | hmAG1 |
| 50 | hsa-miR-149-5p  | MIMAT0000450 | GGUUCGCGAUCGCGGAUCCGGGAGUGAAGACACGGAGCCAGAAGAUCCACCAGGUCGCCACCAUG   | hmAG1 |
| 51 | hsa-miR-296-5p  | MIMAT0000690 | GGUUCGCGAUCGCGGAUCCACAGGAUUGAGGGGGGGCCUAGAUCAACACCAGGUCGCCACCAUG    | hmAG1 |
| 52 | hsa-miR-324-3p  | MIMAT0000762 | GGUUCGCGAUCGCGGAUCCCCAGCAGCACCUGGGGAGUAGAUCAAACACCAGGUCGCCACCAUG    | hmAG1 |
| 53 | hsa-miR-106b-5p | MIMAT0000680 | GGUUCGCGAUCGCGGAUCCAUCGACUGUCAGCACUUUAAGAUCAACACCAGGUCGCCACCAUG     | hmAG1 |
| 54 | hsa-miR-129-5p  | MIMAT0000242 | GGUUCGCGAUCGCGGAUCCGCAAGCCCAGACC GCAAAAAGAGAUCAACACCAGGUCGCCACCAUG  | hmAG1 |
| 55 | hsa-let-7g-5p   | MIMAT0000414 | GGUUCGCGAUCGCGGAUCCAACUGUACAAACUACUACCUCAAGAUCACCAGGUCGCCACCAUG     | hmAG1 |
| 56 | hsa-miR-212-3p  | MIMAT0000269 | GGUUCGCGAUCGCGGAUCCGGCCGUGACUGGAGACUGUUAAGAUCAACACCAGGUCGCCACCAUG   | hmAG1 |
| 57 | hsa-miR-28-5p   | MIMAT0000085 | GGUUCGCGAUCGCGGAUCCCUCAAUAGACUGUGAGCUCCUAGAUACACCAGGUCGCCACCAUG     | hmAG1 |
| 58 | hsa-miR-186-5p  | MIMAT0000456 | GGUUCGCGAUCGCGGAUCCAGCCCCAAAAGGAGAAUUCUUUAGAGAUACACCAGGUCGCCACCAUG  | hmAG1 |
| 59 | hsa-miR-155-5p  | MIMAT0000646 | GGUUCGCGAUCGCGGAUCCACCCCUAUCACGAUUAGCAUUAAGAUCACCAGGUCGCCACCAUG     | hmAG1 |
| 60 | hsa-miR-485-5p  | MIMAT0002175 | GGUUCGCGAUCGCGGAUCCGAAUUAUCACGGCCAGCCUCUAGAUACACCAGGUCGCCACCAUG     | hmAG1 |
| 61 | hsa-miR-330-3p  | MIMAT0000751 | GGUUCGCGAUCGCGGAUCCUCUCUGCAGGCCGUGUGCUUUGCAGAUCCACCAGGUCGCCACCAUG   | hmAG1 |
| 62 | hsa-miR-345-5p  | MIMAT0000772 | GGUUCGCGAUCGCGGAUCCGAGCCCUUGGACUAGGAGUCAGCAGAUACACCAGGUCGCCACCAUG   | hmAG1 |
| 63 | hsa-miR-500a-3p | MIMAT0002871 | GGUUCGCGAUCGCGGAUCCAGAAUCCUUGCCCAGGUGCAUAGAUACACCAGGUCGCCACCAUG     | hmAG1 |
| 64 | hsa-miR-192-5p  | MIMAT0000222 | GGUUCGCGAUCGCGGAUCCGGCUGUCAAUUCAUAGGUCAGAGAUCAACACCAGGUCGCCACCAUG   | hmAG1 |
| 65 | hsa-miR-335-5p  | MIMAT0000765 | GGUUCGCGAUCGCGGAUCCACAUUUUUCGUUAUUGUCUUGAAGAUCACCAGGUCGCCACCAUG     | hmAG1 |
| 66 | hsa-miR-140-5p  | MIMAT0000431 | GGUUCGCGAUCGCGGAUCCCUACCAUAGGGUAAAACCACUGAGAUACACCAGGUCGCCACCAUG    | hmAG1 |
| 67 | hsa-miR-18a-3p  | MIMAT0002891 | GGUUCGCGAUCGCGGAUCCCCAGAAGGAGCACUUAGGGCAGUAGAUCCACCAGGUCGCCACCAUG   | hmAG1 |
| 68 | hsa-miR-148a-3p | MIMAT0000243 | GGUUCGCGAUCGCGGAUCCACAAAGUUCUGUAGUGCACUGAAGAUCACCAGGUCGCCACCAUG     | hmAG1 |
| 69 | hsa-miR-124-3p  | MIMAT0000422 | GGUUCGCGAUCGCGGAUCCGGCAUUCACCAGGUGCCUUAAGAUCAAACACCAGGUCGCCACCAUG   | hmAG1 |
| 70 | hsa-miR-9-5p    | MIMAT0000441 | GGUUCGCGAUCGCGGAUCCUCAUACAGCUAGAUAAACAAAGAAGAUCCACCAGGUCGCCACCAUG   | hmAG1 |
| 71 | hsa-miR-126-3p  | MIMAT0000445 | GGUUCGCGAUCGCGGAUCCCGCAUUUUACUCACGGUACGAAGAUCACCAGGUCGCCACCAUG      | hmAG1 |
| 72 | hsa-miR-101-3p  | MIMAT0000099 | GGUUCGCGAUCGCGGAUCCUUCAGUUUAUCACAGUACUGUAAGAUC AACACCAGGUCGCCACCAUG | hmAG1 |
| 73 | hsa-miR-135a-5p | MIMAT0000428 | GGUUCGCGAUCGCGGAUCCUCACAUAGGAAUAAAAGCCAUAGAUCACCAGGUCGCCACCAUG      | hmAG1 |
| 74 | hsa-miR-141-3p  | MIMAT0000432 | GGUUCGCGAUCGCGGAUCCCAUCUUUACCAGACAGUGUUAAGAUCACCAGGUCGCCACCAUG      | hmAG1 |

|    |                   |              |                                                                     |        |
|----|-------------------|--------------|---------------------------------------------------------------------|--------|
| 75 | hsa-miR-154-5p    | MIMAT0000452 | GGUUCGCGAUCGCGGAUCCCGAAGGCAACACGGUAUACCUAAGAUCACACCGGUCGCCACCAUG    | hmAG1  |
| 76 | hsa-miR-195-5p    | MIMAT0000461 | GGUUCGCGAUCGCGGAUCCGCCAAUUAUUUCUGUGCUGCUAAGAUCACACCGGUCGCCACCAUG    | hmAG1  |
| 77 | hsa-miR-200b-3p   | MIMAT0000318 | GGUUCGCGAUCGCGGAUCCUCAUCAUUAACCAGGCAGUAUUAAGAUCACACCGGUCGCCACCAUG   | hmAG1  |
| 78 | hsa-miR-200c-3p   | MIMAT0000617 | GGUUCGCGAUCGCGGAUCCUCAUCAUUAACCCGGCAGUAUUAAGAUCACACCGGUCGCCACCAUG   | hmAG1  |
| 79 | hsa-miR-210       | MIMAT0000267 | GGUUCGCGAUCGCGGAUCCUCAGCCGUGUCACACGCACAGAGAUCACACCGGUCGCCACCAUG     | hmAG1  |
| 80 | hsa-miR-302a-5p   | MIMAT0000683 | GGUUCGCGAUCGCGGAUCCAGCAAGUACAUCCACGUUUAAGUAGAUCACACCGGUCGCCACCAUG   | hmAG1  |
| 81 | hsa-miR-375       | MIMAT0000728 | GGUUCGCGAUCGCGGAUCCUCACGCGAGCCGAACGAACAAAAGAUCACACCGGUCGCCACCAUG    | hmAG1  |
| 82 | hsa-miR-378a-3p   | MIMAT0000732 | GGUUCGCGAUCGCGGAUCCCUUCUGACUCCAAGUCCAGUAGAUCACACCGGUCGCCACCAUG      | hmAG1  |
| 83 | hsa-miR-512-5p    | MIMAT0002822 | GGUUCGCGAUCGCGGAUCCGAAAGUGCCCUCAAGGUGAGUGAGAUCACACCGGUCGCCACCAUG    | hmAG1  |
| 84 | hsa-miR-518b      | MIMAT0002844 | GGUUCGCGAUCGCGGAUCCACCUCUAAAGGGGAGCGCUUUGAGAUCACACCGGUCGCCACCAUG    | hmAG1  |
| 85 | hsa-miR-518c-3p   | MIMAT0002848 | GGUUCGCGAUCGCGGAUCCACACUCUAAAGAGAAGCGCUUUGAGAUCACACCGGUCGCCACCAUG   | hmAG1  |
| 86 | hsa-miR-519d      | MIMAT0002853 | GGUUCGCGAUCGCGGAUCCACUCUAAAGGGGAGGCACUUGAGAUCACACCGGUCGCCACCAUG     | hmAG1  |
| 87 | hsa-miR-520g      | MIMAT0002858 | GGUUCGCGAUCGCGGAUCCACACUCUAAAGGGAAGCACUUUGAGAUCACACCGGUCGCCACCAUG   | hmAG1  |
| 88 | hsa-miR-523-3p    | MIMAT0002840 | GGUUCGCGAUCGCGGAUCCACCCUCUAUAGGGAAGCGGUUCAGAUCACACCGGUCGCCACCAUG    | hmAG1  |
| 89 | hsa-miR-525-5p    | MIMAT0002838 | GGUUCGCGAUCGCGGAUCCAGAAAGUGCAUCCUCUGGAGAGAUCACACCGGUCGCCACCAUG      | hmAG1  |
| 90 | hsa-miR-526a      | MIMAT0002845 | GGUUCGCGAUCGCGGAUCCAGAAAGUGCUUCCUCUAGAGAGAUCACACCGGUCGCCACCAUG      | hmAG1  |
| 91 | hsa-miR-362-3p    | MIMAT0004683 | GGUUCGCGAUCGCGGAUCCUGAAUCCUUGAAUAGGUGUGUAGAUCACACCGGUCGCCACCAUG     | hmAG1  |
| 92 | hsa-miR-589-5p    | MIMAT0004799 | GGUUCGCGAUCGCGGAUCCUCAGAGCAGACGUGGUUCUCAAGAUCACACCGGUCGCCACCAUG     | hmAG1  |
| 93 | hsa-miR-671-5p    | MIMAT0003880 | GGUUCGCGAUCGCGGAUCCUCCAGCCCCUCCAGGGCUUCCUAGAUCACACCGGUCGCCACCAUG    | hmAG1  |
| 94 | hsa-miR-506-3p    | MIMAT0002878 | GGUUCGCGAUCGCGGAUCCUCUACUCAGAAGGGUGCCUUAAGAUCACACCGGUCGCCACCAUG     | hmAG1  |
| 95 | hsa-miR-125b-1-3p | MIMAT0004592 | GGUUCGCGAUCGCGGAUCCAGCUCCCAAGAGCCUAACCCGUAGAUCACACCGGUCGCCACCAUG    | hmAG1  |
| 96 | hsa-miR-30b-3p    | MIMAT0004589 | GGUUCGCGAUCGCGGAUCCGAAGUAAACAUCCACCUCUCCAGAGAUCACACCGGUCGCCACCAUG   | hmAG1  |
| 7  | hsa-miR-26a-5p    | MIMAT0000082 | GGUUCGCGAUCGCGGAUCCAGCCUAUCCUGGAUUAUUAAGAUCACACCGGUCGCCACCAUG       | tagBFP |
| 8  | hsa-miR-24-3p     | MIMAT0000080 | GGUUCGCGAUCGCGGAUCCUGUUCUGCUGAACUGAGCCAAGAUCACACCGGUCGCCACCAUG      | tagBFP |
| 9  | hsa-miR-27a-3p    | MIMAT0000084 | GGUUCGCGAUCGCGGAUCCGCGGAACUAGCCACUGUGAAAGAUCACACCGGUCGCCACCAUG      | tagBFP |
| 10 | hsa-miR-21-5p     | MIMAT0000076 | GGUUCGCGAUCGCGGAUCCUCAACAUCAGUCUGAUAAAGCUAAGAUCACACCGGUCGCCACCAUG   | tagBFP |
| 11 | hsa-miR-143-3p    | MIMAT0000435 | GGUUCGCGAUCGCGGAUCCGAGCUACAGUGCUUCAUCUCAAGAUCACACCGGUCGCCACCAUG     | tagBFP |
| 12 | hsa-let-7i-5p     | MIMAT0000415 | GGUUCGCGAUCGCGGAUCCAACAGCACAACUACUACCUCAAGAUCACACCGGUCGCCACCAUG     | tagBFP |
| 13 | hsa-miR-409-3p    | MIMAT0001639 | GGUUCGCGAUCGCGGAUCCAGGGGUUCACCGAGCAACAUUCAGAUCACACCGGUCGCCACCAUG    | tagBFP |
| 14 | hsa-miR-196b-5p   | MIMAT0001080 | GGUUCGCGAUCGCGGAUCCCCCAACAACAGGAAACUACCUAAGAUCACACCGGUCGCCACCAUG    | tagBFP |
| 15 | hsa-miR-501-5p    | MIMAT0002872 | GGUUCGCGAUCGCGGAUCCUCUACCCAGGGACAAAGGAUUAAGAUCACACCGGUCGCCACCAUG    | tagBFP |
| 16 | hsa-miR-362-5p    | MIMAT0000705 | GGUUCGCGAUCGCGGAUCCACUCACACCUAGGUUCCAAGGAUUAAGAUCACACCGGUCGCCACCAUG | tagBFP |
| 17 | hsa-miR-193a-3p   | MIMAT0000459 | GGUUCGCGAUCGCGGAUCCACUGGGACUUUGUAGGCCAGUUAAGAUCACACCGGUCGCCACCAUG   | tagBFP |
| 18 | hsa-miR-134       | MIMAT0000447 | GGUUCGCGAUCGCGGAUCCCCCCUCUGGUCAACCAGUCACAAGAUCACACCGGUCGCCACCAUG    | tagBFP |
| 19 | hsa-miR-299-3p    | MIMAT0000687 | GGUUCGCGAUCGCGGAUCCAAGCGGUUUAACCAUCCACAUAGAUCACACCGGUCGCCACCAUG     | tagBFP |
| 20 | hsa-miR-483-3p    | MIMAT0002173 | GGUUCGCGAUCGCGGAUCCAAGACGGGAGGAGAGUGAAGAUCACACCGGUCGCCACCAUG        | tagBFP |



|    |                 |              |                                                                   |        |
|----|-----------------|--------------|-------------------------------------------------------------------|--------|
| 21 | hsa-miR-150-5p  | MIMAT0000451 | GGUUCGCGAUCGCGGAUCCACUGGUACAAGGGUUGGGAGAAGAUACACACCGGUCGCCACCAUG  | tagBFP |
| 22 | hsa-miR-200a-3p | MIMAT0000682 | GGUUCGCGAUCGCGGAUCCACAUCGUUACCAGACAGUGUUAAGAUACACACCGGUCGCCACCAUG | tagBFP |
| 23 | hsa-miR-133b    | MIMAT0000770 | GGUUCGCGAUCGCGGAUCCUAGCUGGUUGAAGGGGACCAAAAGAUACACACCGGUCGCCACCAUG | tagBFP |
| 24 | hsa-miR-520c-3p | MIMAT0002846 | GGUUCGCGAUCGCGGAUCCACCCUCUAAAAGGAAGCACUUUAGAUACACACCGGUCGCCACCAUG | tagBFP |
| 25 | hsa-miR-378a-5p | MIMAT0000731 | GGUUCGCGAUCGCGGAUCCACACAGGACCUGGAGUCAGGAGAGAUACACACCGGUCGCCACCAUG | tagBFP |
| 26 | hsa-miR-373-3p  | MIMAT0000726 | GGUUCGCGAUCGCGGAUCCACACCCCAAAAUCGAAGCACUUCAGAUCCACCGGUCGCCACCAUG  | tagBFP |
| 27 | hsa-miR-492     | MIMAT0002812 | GGUUCGCGAUCGCGGAUCCAAGAAUCUUGUCCCGCAGGUCCUAGAUCACACCGGUCGCCACCAUG | tagBFP |
| 28 | hsa-miR-509-3p  | MIMAT0002881 | GGUUCGCGAUCGCGGAUCCCUACCCACAGACGUACCAAUCAAGAUACACACCGGUCGCCACCAUG | tagBFP |
| 29 | hsa-miR-516b-5p | MIMAT0002859 | GGUUCGCGAUCGCGGAUCCAAAGUGCUUCUACCUCAGAUAGAUACACACCGGUCGCCACCAUG   | tagBFP |
| 30 | hsa-miR-518c-5p | MIMAT0002847 | GGUUCGCGAUCGCGGAUCCAGAAAGUGCUUCCUCCAGAGAAGAUCCACCGGUCGCCACCAUG    | tagBFP |
| 31 | hsa-miR-520f    | MIMAT0002830 | GGUUCGCGAUCGCGGAUCCAACCCUCUAAAAGGAAGCACUUAGAUACACACCGGUCGCCACCAUG | tagBFP |
| 32 | hsa-miR-98-5p   | MIMAT0000096 | GGUUCGCGAUCGCGGAUCCAACAAUACAACUACUACCUCAAGAUACACACCGGUCGCCACCAUG  | tagBFP |
| 33 | hsa-miR-320b    | MIMAT0005792 | GGUUCGCGAUCGCGGAUCCUUGCCUCUCAACCCAGCUUUUAGAUACACACCGGUCGCCACCAUG  | tagBFP |
| 34 | hsa-miR-423-5p  | MIMAT0004748 | GGUUCGCGAUCGCGGAUCCAAGUCUCGCUCUCUGCCCCUCAAGAUCACACCGGUCGCCACCAUG  | tagBFP |
| 35 | hsa-miR-140-3p  | MIMAT0004597 | GGUUCGCGAUCGCGGAUCCCGUGGUUCUACCCUGUGGUAAGAUCAACACCGGUCGCCACCAUG   | tagBFP |
| 36 | hsa-miR-378c    | MIMAT0016847 | GGUUCGCGAUCGCGGAUCCCCACUCUUCUGACUCCAAGUCCAGUAUCCACCGGUCGCCACCAUG  | tagBFP |
| 37 | hsa-miR-185-5p  | MIMAT0000455 | GGUUCGCGAUCGCGGAUCCUCAGGAACUGCCUUCUCUCCAAGAUACACACCGGUCGCCACCAUG  | tagBFP |
| 38 | hsa-miR-378b    | MIMAT0014999 | GGUUCGCGAUCGCGGAUCCUUCUGCCUCCAAGUCCAGUAGAUCCAAACACCGGUCGCCACCAUG  | tagBFP |
| 39 | hsa-miR-128     | MIMAT0000424 | GGUUCGCGAUCGCGGAUCCAAGAGACCUGGUUCACUGUGAAGAUCAACACCGGUCGCCACCAUG  | tagBFP |
| 40 | hsa-miR-509-5p  | MIMAT0004779 | GGUUCGCGAUCGCGGAUCCUGAUUGCCACUGUCUGCAGUAAGAUCAACACCGGUCGCCACCAUG  | tagBFP |
| 41 | hsa-miR-340-5p  | MIMAT0004692 | GGUUCGCGAUCGCGGAUCCAUCAGUCUCAUUGCUUUUAAGAUACACACCGGUCGCCACCAUG    | tagBFP |
| 42 | hsa-miR-25-5p   | MIMAT0004498 | GGUUCGCGAUCGCGGAUCCCAAUUGCCCAAGUCUCCGCCUAGAUCAAACACCGGUCGCCACCAUG | tagBFP |
| 43 | hsa-miR-92b-3p  | MIMAT0003218 | GGUUCGCGAUCGCGGAUCCGAGGCCGGGACGAGUGCAAUAAGAUACACACCGGUCGCCACCAUG  | tagBFP |
| 44 | hsa-miR-320c    | MIMAT0005793 | GGUUCGCGAUCGCGGAUCCACCCUCUCAACCCAGCUUUUAGAUCAAACACCGGUCGCCACCAUG  | tagBFP |
| 45 | hsa-miR-508-3p  | MIMAT0002880 | GGUUCGCGAUCGCGGAUCCUCUACUCCAAAAGGCUACAAUCAAGAUCCACCGGUCGCCACCAUG  | tagBFP |
| 46 | hsa-miR-744-5p  | MIMAT0004945 | GGUUCGCGAUCGCGGAUCCUGCUGUAGCCCUAGCCCCGCAAGAUACACACCGGUCGCCACCAUG  | tagBFP |
| 47 | hsa-miR-3180-3p | MIMAT0015058 | GGUUCGCGAUCGCGGAUCCGGCCUCCGGAAGCUCGCCCCAAGAUACACACCGGUCGCCACCAUG  | tagBFP |
| 48 | hsa-miR-30d-3p  | MIMAT0004551 | GGUUCGCGAUCGCGGAUCCGCAGCAAACUUCGACUGAAAGAGAUACACACCGGUCGCCACCAUG  | tagBFP |
| 49 | hsa-miR-215     | MIMAT0000272 | GGUUCGCGAUCGCGGAUCCGUCUGCAAUUCAUAGGUCAUAGAUCAAACACCGGUCGCCACCAUG  | tagBFP |
| 50 | hsa-miR-4510    | MIMAT0019047 | GGUUCGCGAUCGCGGAUCCAACCAUACAUCUACUCCUACAAGAUACACACCGGUCGCCACCAUG  | tagBFP |
| 51 | hsa-miR-1260a   | MIMAT0005911 | GGUUCGCGAUCGCGGAUCCUGGUGGCAGAGGUGGGAUAGAUCACCGGUCGCCACCAUG        | tagBFP |
| 52 | hsa-miR-151a-5p | MIMAT0004697 | GGUUCGCGAUCGCGGAUCCACUAGACUGUGAGCUCCUCGAAGAUCAACACCGGUCGCCACCAUG  | tagBFP |
| 53 | hsa-miR-584-5p  | MIMAT0003249 | GGUUCGCGAUCGCGGAUCCUCAGUCCAGGCAAACCAUAAAGAUACACACCGGUCGCCACCAUG   | tagBFP |
| 54 | hsa-miR-503-5p  | MIMAT0002874 | GGUUCGCGAUCGCGGAUCCUUGCAGAACUGUCCCGCUGCUAAGAUCCACCGGUCGCCACCAUG   | tagBFP |
| 55 | hsa-miR-34c-5p  | MIMAT0000686 | GGUUCGCGAUCGCGGAUCCGCAUACAGCUAACUACACUGCCUAGAUCACACCGGUCGCCACCAUG | tagBFP |
| 56 | hsa-miR-3180    | MIMAT0018178 | GGUUCGCGAUCGCGGAUCCUCCGGAAGCUCGCCCCAAGAUCCAAACACCGGUCGCCACCAUG    | tagBFP |

|    |                 |              |                                                                   |        |
|----|-----------------|--------------|-------------------------------------------------------------------|--------|
| 57 | hsa-miR-514a-3p | MIMAT0002883 | GGUUCGCGAUCGCGGAUCCUCUACUCACAGAAGUGUCAUAGAUAACACCGGUCGCCACCAUG    | tagBFP |
| 58 | hsa-miR-374b-5p | MIMAT0004955 | GGUUCGCGAUCGCGGAUCCACUUAGCAGGUUGUAUUUAUAGAUAACACCGGUCGCCACCAUG    | tagBFP |
| 59 | hsa-miR-28-3p   | MIMAT0004502 | GGUUCGCGAUCGCGGAUCCUCCAGGAGCUCACAAUCUAGUGAGAUAACACCGGUCGCCACCAUG  | tagBFP |
| 60 | hsa-miR-1307-5p | MIMAT0022727 | GGUUCGCGAUCGCGGAUCCAGCCGGUCGAGGUCCGGUCGAAGAUAACACCGGUCGCCACCAUG   | tagBFP |
| 61 | hsa-miR-21-3p   | MIMAT0004494 | GGUUCGCGAUCGCGGAUCCACAGCCCAUCGACUGGUGUAGAGAUAACACCGGUCGCCACCAUG   | tagBFP |
| 62 | hsa-miR-193a-5p | MIMAT0004614 | GGUUCGCGAUCGCGGAUCCUCAUCUCGCCCGCAAAGACCCAAGAUAACACCGGUCGCCACCAUG  | tagBFP |
| 63 | hsa-miR-1269a   | MIMAT0005923 | GGUUCGCGAUCGCGGAUCCCCAGUAGCACGGCUCAGUCCAGAGAUAACACCGGUCGCCACCAUG  | tagBFP |
| 64 | hsa-miR-365b-3p | MIMAT0022834 | GGUUCGCGAUCGCGGAUCCAUAAGGAUUUUUAGGGGCAUUAAGAUAACACCGGUCGCCACCAUG  | tagBFP |
| 65 | hsa-miR-4286    | MIMAT0016916 | GGUUCGCGAUCGCGGAUCCGGUACCAGGAGUGGGUAGAUAACACCGGUCGCCACCAUG        | tagBFP |
| 66 | hsa-miR-4454    | MIMAT0018976 | GGUUCGCGAUCGCGGAUCCUGGUGCCGUGACUCGGAUCCAGAUAACACCGGUCGCCACCAUG    | tagBFP |
| 67 | hsa-miR-138-5p  | MIMAT0000430 | GGUUCGCGAUCGCGGAUCCCGGCCUGAUUCACAACACCAGCUAGAUAACACCGGUCGCCACCAUG | tagBFP |
| 68 | hsa-miR-1307-3p | MIMAT0005951 | GGUUCGCGAUCGCGGAUCCCACGACCCGACGCCACGCCAGUAGAUAACACCGGUCGCCACCAUG  | tagBFP |
| 69 | hsa-miR-652-3p  | MIMAT0003322 | GGUUCGCGAUCGCGGAUCCCACAACCCUAGUGGCCCAUUAAGAUAACACCGGUCGCCACCAUG   | tagBFP |
| 70 | hsa-miR-502-3p  | MIMAT0004775 | GGUUCGCGAUCGCGGAUCCUGAAUCCUUGCCCAGGUGCAUUAAGAUAACACCGGUCGCCACCAUG | tagBFP |
| 71 | hsa-miR-92b-5p  | MIMAT0004792 | GGUUCGCGAUCGCGGAUCCACUGCACCCGCUCCGUCUCCUAGAUAACACCGGUCGCCACCAUG   | tagBFP |
| 72 | hsa-miR-501-3p  | MIMAT0004774 | GGUUCGCGAUCGCGGAUCCAGAAUCCUUGCCCAGGUGCAUUAAGAUAACACCGGUCGCCACCAUG | tagBFP |
| 73 | hsa-miR-1285-3p | MIMAT0005876 | GGUUCGCGAUCGCGGAUCCAGGUCUCACUUUGUUGCCCAGAAGAUAACACCGGUCGCCACCAUG  | tagBFP |
| 74 | hsa-miR-296-3p  | MIMAT0004679 | GGUUCGCGAUCGCGGAUCCGGAGAGCCUCCACCCAACCCUCAGAUAACACCGGUCGCCACCAUG  | tagBFP |
| 75 | hsa-miR-506-5p  | MIMAT0022701 | GGUUCGCGAUCGCGGAUCCUUAAGUAACACCUUCCUGAAUUAAGAUAACACCGGUCGCCACCAUG | tagBFP |
| 76 | hsa-miR-361-3p  | MIMAT0004682 | GGUUCGCGAUCGCGGAUCCAAUACAGAAUACACCCUGGGGGAAGAUAACACCGGUCGCCACCAUG | tagBFP |
| 77 | hsa-miR-582-3p  | MIMAT0004797 | GGUUCGCGAUCGCGGAUCCGGUUCAGUUGUUAACCAGUUAAGAUAACACCGGUCGCCACCAUG   | tagBFP |
| 78 | hsa-miR-422a    | MIMAT0001339 | GGUUCGCGAUCGCGGAUCCGCCUUCUGACCCUAAAGUCCAGUAGAUAACACCGGUCGCCACCAUG | tagBFP |
| 79 | hsa-miR-98-3p   | MIMAT0022842 | GGUUCGCGAUCGCGGAUCCGGGAAAGUAGUAAGUUGUAUAGAGAUAACACCGGUCGCCACCAUG  | tagBFP |
| 80 | hsa-miR-499a-5p | MIMAT0002870 | GGUUCGCGAUCGCGGAUCCAAACAUCACUGCAAGUCUAAAAGAUAACACCGGUCGCCACCAUG   | tagBFP |
| 81 | hsa-miR-24-2-5p | MIMAT0004497 | GGUUCGCGAUCGCGGAUCCUGUGUUUCAGCUCAGUAGGCAAGAUAACACCGGUCGCCACCAUG   | tagBFP |
| 82 | hsa-miR-105-5p  | MIMAT0000102 | GGUUCGCGAUCGCGGAUCCACCACAGGAGUCUGAGCAUUGAAGAUAACACCGGUCGCCACCAUG  | tagBFP |
| 83 | hsa-miR-381-3p  | MIMAT0000736 | GGUUCGCGAUCGCGGAUCCACAGAGAGCUUGCCUUGUAUAAGAUAACACCGGUCGCCACCAUG   | tagBFP |
| 84 | hsa-miR-181b-3p | MIMAT0022692 | GGUUCGCGAUCGCGGAUCCUUGCAUUCUUGUUCAGUGAGAGAUAACACCGGUCGCCACCAUG    | tagBFP |
| 85 | hsa-miR-122-5p  | MIMAT0000421 | GGUUCGCGAUCGCGGAUCCCAAACACCAUUGUCACACUCCAAGAUAACACCGGUCGCCACCAUG  | tagBFP |
| 86 | hsa-miR-27a-5p  | MIMAT0004501 | GGUUCGCGAUCGCGGAUCCUGCUCACAAGCAGCUAAGCCUAGAUAACACCGGUCGCCACCAUG   | tagBFP |
| 87 | hsa-miR-505-5p  | MIMAT0004776 | GGUUCGCGAUCGCGGAUCCACAUAUAUACUUCUGGCUCUCCAGAUAACACCGGUCGCCACCAUG  | tagBFP |
| 88 | hsa-miR-454-3p  | MIMAT0003885 | GGUUCGCGAUCGCGGAUCCACCCUAUAAGCAAUAUUGCACUAAGAUAACACCGGUCGCCACCAUG | tagBFP |
| 89 | hsa-miR-301a-3p | MIMAT0000688 | GGUUCGCGAUCGCGGAUCCGCUUUGACAAUACUAUUGCACUGAGAUAACACCGGUCGCCACCAUG | tagBFP |
| 90 | hsa-miR-510     | MIMAT0002882 | GGUUCGCGAUCGCGGAUCCGUGAUUGCCACUCUCCUGAGUAAGAUAACACCGGUCGCCACCAUG  | tagBFP |
| 91 | hsa-miR-411-5p  | MIMAT0003329 | GGUUCGCGAUCGCGGAUCCCGUACGCUAUACGGUCUACUAAGAUAACACCGGUCGCCACCAUG   | tagBFP |
| 92 | hsa-miR-29c-5p  | MIMAT0004673 | GGUUCGCGAUCGCGGAUCCGAACACCAGGAGAAUUCGGUCAAGAUAACACCGGUCGCCACCAUG  | tagBFP |

|    |                   |              |                                                                   |        |
|----|-------------------|--------------|-------------------------------------------------------------------|--------|
| 93 | hsa-miR-148b-5p   | MIMAT0004699 | GGUUCGCGAUCGCGGAUCCGCCUGAGUGUAUAACAGAACUUAGAUCACACCGGUCGCCACCAUG  | tagBFP |
| 94 | hsa-miR-204-3p    | MIMAT0022693 | GGUUCGCGAUCGCGGAUCCACGUCCUUUGCCUUCCCAGCAGAUCAACACCGGUCGCCACCAUG   | tagBFP |
| 95 | hsa-miR-486-3p    | MIMAT0004762 | GGUUCGCGAUCGCGGAUCCAUCUGUACUGAGCUGCCCCGAGAUCAACACCGGUCGCCACCAUG   | tagBFP |
| 96 | hsa-miR-125b-2-3p | MIMAT0004603 | GGUUCGCGAUCGCGGAUCCGUCCCAAGAGCCUGACUUGUGAAGAUCACACCGGUCGCCACCAUG  | tagBFP |
| 7  | hsa-miR-16-5p     | MIMAT0000069 | GGUUCGCGAUCGCGGAUCCCGCCAAUAUUUACGUGCUGCUAAGAUCACACCGGUCGCCACCAUG  | hdKRed |
| 8  | hsa-miR-17-5p     | MIMAT0000070 | GGUUCGCGAUCGCGGAUCCCUACCUGCACUGUAAGCACUUUGAGAUCACACCGGUCGCCACCAUG | hdKRed |
| 9  | hsa-miR-125b-5p   | MIMAT0000423 | GGUUCGCGAUCGCGGAUCCUCACAAGUUAGGGUCUCAGGGAAGAUCACACCGGUCGCCACCAUG  | hdKRed |
| 10 | hsa-miR-93-5p     | MIMAT0000093 | GGUUCGCGAUCGCGGAUCCCUACCUGCACGAACAGCACUUUGAGAUCACACCGGUCGCCACCAUG | hdKRed |
| 11 | hsa-miR-20a-5p    | MIMAT0000075 | GGUUCGCGAUCGCGGAUCCCUACCUGCACUAUAAGCACUUUAAGAUCACACCGGUCGCCACCAUG | hdKRed |
| 12 | hsa-miR-106a-5p   | MIMAT0000103 | GGUUCGCGAUCGCGGAUCCCUACCUGCACUGUAAGCACUUUAGAUCACACCGGUCGCCACCAUG  | hdKRed |
| 13 | hsa-miR-145-5p    | MIMAT0000437 | GGUUCGCGAUCGCGGAUCCAGGGAUUCCUGGAAAACUGGACAGAUCACACCGGUCGCCACCAUG  | hdKRed |
| 14 | hsa-miR-4531      | MIMAT0019070 | GGUUCGCGAUCGCGGAUCCUCAGAAGCCUUCUCCAUAAGAUCACACCGGUCGCCACCAUG      | hdKRed |
| 15 | hsa-miR-193b-5p   | MIMAT0004767 | GGUUCGCGAUCGCGGAUCCUCAUCUGCCCUCAAACCCCGAGAUCAACACCGGUCGCCACCAUG   | hdKRed |
| 16 | hsa-miR-181a-2-3p | MIMAT0004558 | GGUUCGCGAUCGCGGAUCCGGUACAGUCAACGGUCAGUGGUAGAUCACACCGGUCGCCACCAUG  | hdKRed |
| 17 | hsa-miR-1301      | MIMAT0005797 | GGUUCGCGAUCGCGGAUCCGAAGUCACUCCAGGCAGCUGCAAGAUCACACCGGUCGCCACCAUG  | hdKRed |
| 18 | hsa-miR-877-5p    | MIMAT0004949 | GGUUCGCGAUCGCGGAUCCCCUUGCGCAUCUCCUCUACAGAUAACACCGGUCGCCACCAUG     | hdKRed |
| 19 | hsa-miR-4443      | MIMAT0018961 | GGUUCGCGAUCGCGGAUCCAAAACCCACGCCUCCAAAGAUCACACCGGUCGCCACCAUG       | hdKRed |
| 20 | hsa-miR-425-5p    | MIMAT0003393 | GGUUCGCGAUCGCGGAUCCUCAACGGGAGUGAUCGUGUCAUUAGAUCACACCGGUCGCCACCAUG | hdKRed |
| 21 | hsa-miR-320d      | MIMAT0006764 | GGUUCGCGAUCGCGGAUCCUCCUCUCAACCCAGCUUUUAGAUCCAAACACCGGUCGCCACCAUG  | hdKRed |
| 22 | hsa-let-7a-3p     | MIMAT0004481 | GGUUCGCGAUCGCGGAUCCGAAAGACAGUAGAUUGUAUAGAGAUCAAACACCGGUCGCCACCAUG | hdKRed |
| 23 | hsa-miR-92a-1-5p  | MIMAT0004507 | GGUUCGCGAUCGCGGAUCCAGCAUUGCAACCGAUCCCAACCUAGAUCACACCGGUCGCCACCAUG | hdKRed |
| 24 | hsa-miR-365b-5p   | MIMAT0022833 | GGUUCGCGAUCGCGGAUCCACAGCUGCCCUGAAAGUCCCUAGAUCACACCGGUCGCCACCAUG   | hdKRed |
| 25 | hsa-miR-142-3p    | MIMAT0000434 | GGUUCGCGAUCGCGGAUCCUCAAAAAGUAGGAAACACUACAAGAUCACACCGGUCGCCACCAUG  | hdKRed |
| 26 | hsa-miR-320e      | MIMAT0015072 | GGUUCGCGAUCGCGGAUCCCUUUCUCAACCCAGCUUUAGAUCACACCGGUCGCCACCAUG      | hdKRed |
| 27 | hsa-miR-106b-3p   | MIMAT0004672 | GGUUCGCGAUCGCGGAUCCGCAGCAAGUACCCACAGUGCGGAGAUCACACCGGUCGCCACCAUG  | hdKRed |
| 28 | hsa-miR-548i      | MIMAT0005935 | GGUUCGCGAUCGCGGAUCCGGCAAAAUCCGCAUUACUUUAGAUCACACCGGUCGCCACCAUG    | hdKRed |
| 29 | hsa-miR-1261      | MIMAT0005913 | GGUUCGCGAUCGCGGAUCCAAGCCAAAGCCUUAUCCAUAAGAUCCAAACACCGGUCGCCACCAUG | hdKRed |
| 30 | hsa-miR-9-3p      | MIMAT0000442 | GGUUCGCGAUCGCGGAUCCACUUUCGGUUAUCUAGCUUUUAAGAUCACACCGGUCGCCACCAUG  | hdKRed |
| 31 | hsa-miR-129-1-3p  | MIMAT0004548 | GGUUCGCGAUCGCGGAUCCAUACUUUUUGGGUUAAGGGCUAGAUCACACCGGUCGCCACCAUG   | hdKRed |
| 32 | hsa-miR-424-3p    | MIMAT0004749 | GGUUCGCGAUCGCGGAUCCAUAGCAGCGCCUCACGUUUUGAGAUCAAACACCGGUCGCCACCAUG | hdKRed |
| 33 | hsa-miR-760       | MIMAT0004957 | GGUUCGCGAUCGCGGAUCCUCCACAGACCCAGAGCCGAGAUCAAACACCGGUCGCCACCAUG    | hdKRed |
| 34 | hsa-miR-365a-5p   | MIMAT0009199 | GGUUCGCGAUCGCGGAUCCACAUCUGCCCCAAAAGUCCCUAGAUCACACCGGUCGCCACCAUG   | hdKRed |
| 35 | hsa-miR-374a-5p   | MIMAT0000727 | GGUUCGCGAUCGCGGAUCCACUUUACAGGUUGUAUUUAAGAUCACACCGGUCGCCACCAUG     | hdKRed |
| 36 | hsa-miR-873-5p    | MIMAT0004953 | GGUUCGCGAUCGCGGAUCCAGGAGACUCACAAGUCCUGCAGAUCAAACACCGGUCGCCACCAUG  | hdKRed |
| 37 | hsa-miR-30c-2-3p  | MIMAT0004550 | GGUUCGCGAUCGCGGAUCCAGAGUAAACAGCCUUCUCCAGAGAUCACACCGGUCGCCACCAUG   | hdKRed |
| 38 | hsa-miR-99b-3p    | MIMAT0004678 | GGUUCGCGAUCGCGGAUCCCGGACCCACAGACACGAGCUUGAGAUCACACCGGUCGCCACCAUG  | hdKRed |

|    |                 |              |                                                                    |        |
|----|-----------------|--------------|--------------------------------------------------------------------|--------|
| 39 | hsa-miR-4532    | MIMAT0019071 | GGUUCGCGAUCGCGGAUCCCGCCGGGCUCCCCGGGGAGAUCACACCGGUCGCCACCAUG        | hdKRed |
| 40 | hsa-miR-20b-3p  | MIMAT0004752 | GGUUCGCGAUCGCGGAUCCUGGAAGUGCCCAUACUACAGUAGAUCACACCGGUCGCCACCAUG    | hdKRed |
| 41 | hsa-miR-4448    | MIMAT0018967 | GGUUCGCGAUCGCGGAUCCUACCCCUAGACCAAGGAGCCAGAUCAAACACCGGUCGCCACCAUG   | hdKRed |
| 42 | hsa-miR-363-5p  | MIMAT0003385 | GGUUCGCGAUCGCGGAUCCAAAUUGCAUCGUGAUCCACCCGAGAUACACACCGGUCGCCACCAUG  | hdKRed |
| 43 | hsa-miR-145-3p  | MIMAT0004601 | GGUUCGCGAUCGCGGAUCCAGAACAGUAUUUCCAGGAAUCCAGAUACACACCGGUCGCCACCAUG  | hdKRed |
| 44 | hsa-miR-574-5p  | MIMAT0004795 | GGUUCGCGAUCGCGGAUCCACACACUCACACACACACUCAAGAUCACACCGGUCGCCACCAUG    | hdKRed |
| 45 | hsa-miR-223-3p  | MIMAT0000280 | GGUUCGCGAUCGCGGAUCCUGGGGUUUUUGACAAACUGACAAGAUCACACCGGUCGCCACCAUG   | hdKRed |
| 46 | hsa-miR-4521    | MIMAT0019058 | GGUUCGCGAUCGCGGAUCCUGAGCACAGGACUUCUUAGCAGAUACACACCGGUCGCCACCAUG    | hdKRed |
| 47 | hsa-miR-22-5p   | MIMAT0004495 | GGUUCGCGAUCGCGGAUCCAAAAGCUUGCCACUGAAGAUCUAGAUCACACCGGUCGCCACCAUG   | hdKRed |
| 48 | hsa-miR-339-3p  | MIMAT0004702 | GGUUCGCGAUCGCGGAUCCCGGCUCUGUCGUCGAGGCGUCAAGAUCACACCGGUCGCCACCAUG   | hdKRed |
| 49 | hsa-miR-16-2-3p | MIMAT0004518 | GGUUCGCGAUCGCGGAUCCUAAAAGCAGCACAGUAUAUUGGAGAUACACACCGGUCGCCACCAUG  | hdKRed |
| 50 | hsa-miR-374a-3p | MIMAT0004688 | GGUUCGCGAUCGCGGAUCCAAUUACAUAUACUUGAUAAAGAGAUACACACCGGUCGCCACCAUG   | hdKRed |
| 51 | hsa-miR-542-3p  | MIMAT0003389 | GGUUCGCGAUCGCGGAUCCUUUCAGUUUAUCAAUCUGUCACAAGAUCACACCGGUCGCCACCAUG  | hdKRed |
| 52 | hsa-miR-452-5p  | MIMAT0001635 | GGUUCGCGAUCGCGGAUCCUCAGUUUCCUCUGCAAACAGUUAGAUCACACCGGUCGCCACCAUG   | hdKRed |
| 53 | hsa-miR-513a-3p | MIMAT0004777 | GGUUCGCGAUCGCGGAUCCCUUCUCAGAAAGGUGAAUUUAAGAUCACACCGGUCGCCACCAUG    | hdKRed |
| 54 | hsa-miR-532-3p  | MIMAT0004780 | GGUUCGCGAUCGCGGAUCCUGCAAGCCUUGGGUGUGGGAGGAGAUACACACCGGUCGCCACCAUG  | hdKRed |
| 55 | hsa-miR-548a-3p | MIMAT0003251 | GGUUCGCGAUCGCGGAUCCGAAAAGUAAUUGCCAGUUUUGAGAUACACACCGGUCGCCACCAUG   | hdKRed |
| 56 | hsa-miR-27b-5p  | MIMAT0004588 | GGUUCGCGAUCGCGGAUCCGUUCACCAAUCAGCUAAGCUCUAGAUCACACCGGUCGCCACCAUG   | hdKRed |
| 57 | hsa-miR-3180-5p | MIMAT0015057 | GGUUCGCGAUCGCGGAUCCCGACGUGGGGCGGAGCGUCUGGAGAUACACACCGGUCGCCACCAUG  | hdKRed |
| 58 | hsa-miR-4324    | MIMAT0016876 | GGUUCGCGAUCGCGGAUCCUUAAGGUUAGGGUCUCAGGGAGAUCAAACACCGGUCGCCACCAUG   | hdKRed |
| 59 | hsa-let-7d-3p   | MIMAT0004484 | GGUUCGCGAUCGCGGAUCCAGAAAGGCAGCAGGUCGUUAAGAGAUACACACCGGUCGCCACCAUG  | hdKRed |
| 60 | hsa-miR-184     | MIMAT0000454 | GGUUCGCGAUCGCGGAUCCACCCUUAUCAGUUCUCCGUCCAAGAUCACACCGGUCGCCACCAUG   | hdKRed |
| 61 | hsa-miR-95      | MIMAT0000094 | GGUUCGCGAUCGCGGAUCCUGCUCAAUAAAUACCCGUUGAAAGAUCACACCGGUCGCCACCAUG   | hdKRed |
| 62 | hsa-miR-664a-5p | MIMAT0005948 | GGUUCGCGAUCGCGGAUCCAUCCAUAUUUCCCUAGCCAGUAGAUCACACCGGUCGCCACCAUG    | hdKRed |
| 63 | hsa-miR-1234-5p | MIMAT0022944 | GGUUCGCGAUCGCGGAUCCCGGCCCCCCCCCCCCCCCCCCCAGAUCAAACACCGGUCGCCACCAUG | hdKRed |
| 64 | hsa-miR-185-3p  | MIMAT0004611 | GGUUCGCGAUCGCGGAUCCGACCAGAGGAAAGCCAGCCCUAGAUCACACCGGUCGCCACCAUG    | hdKRed |
| 65 | hsa-miR-301a-5p | MIMAT0022696 | GGUUCGCGAUCGCGGAUCCAGUAGUGCAAUAAAGUCAGAGCAGAUACACACCGGUCGCCACCAUG  | hdKRed |
| 66 | hsa-miR-425-3p  | MIMAT0001343 | GGUUCGCGAUCGCGGAUCCGGGCGGACACGACAUUCCCGAUAGAUCACACCGGUCGCCACCAUG   | hdKRed |
| 67 | hsa-miR-497-5p  | MIMAT0002820 | GGUUCGCGAUCGCGGAUCCACAAACCACAGUGUGCUGCUGAGAUCAAACACCGGUCGCCACCAUG  | hdKRed |
| 68 | hsa-miR-10b-3p  | MIMAT0004556 | GGUUCGCGAUCGCGGAUCCAUUCCCUUAGAAUCGAAUCUGUAGAUCACACCGGUCGCCACCAUG   | hdKRed |
| 69 | hsa-miR-329     | MIMAT0001629 | GGUUCGCGAUCGCGGAUCCAAAGAGGUUAACCAGGUGUGUUAGAUCACACCGGUCGCCACCAUG   | hdKRed |
| 70 | hsa-miR-144-3p  | MIMAT0000436 | GGUUCGCGAUCGCGGAUCCAGUACAUCUAUCUUAACUGUAAGAUCAAACACCGGUCGCCACCAUG  | hdKRed |
| 71 | hsa-miR-211-3p  | MIMAT0022694 | GGUUCGCGAUCGCGGAUCCGCACCCUUUGCUGUCCUGCAGAUCAAACACCGGUCGCCACCAUG    | hdKRed |
| 72 | hsa-miR-379-5p  | MIMAT0000733 | GGUUCGCGAUCGCGGAUCCCUACGUUCCAUGUCUACCAAGAUCAAACACCGGUCGCCACCAUG    | hdKRed |
| 73 | hsa-miR-629-5p  | MIMAT0004810 | GGUUCGCGAUCGCGGAUCCAGUUCUCCCAACGUAAACCCAAGAUCAAACACCGGUCGCCACCAUG  | hdKRed |
| 74 | hsa-miR-212-5p  | MIMAT0022695 | GGUUCGCGAUCGCGGAUCCAGUAAGCAGUCUAGAGCCAAGGUAGAUCACACCGGUCGCCACCAUG  | hdKRed |

|    |                 |              |                                                                       |        |
|----|-----------------|--------------|-----------------------------------------------------------------------|--------|
| 75 | hsa-miR-582-5p  | MIMAT0003247 | GGUUCCGCGAUCGCGGAUCCAGUAACUGGUUGAACACUGUAAAGAUCACCACGGUCGCCACCAUG     | hdKRed |
| 76 | hsa-miR-197-5p  | MIMAT0022691 | GGUUCCGCGAUCGCGGAUCCCCUCCCACUGCCCUCUCUACCCGAGAUCACCACGGUCGCCACCAUG    | hdKRed |
| 77 | hsa-miR-222-5p  | MIMAT0004569 | GGUUCCGCGAUCGCGGAUCCAGGAUCUACACUGGCUACUGAGAGAUCACACCACGGUCGCCACCAUG   | hdKRed |
| 78 | hsa-miR-93-3p   | MIMAT0004509 | GGUUCCGCGAUCGCGGAUCCCGGGAAGUGCUAGCUCAGCAGUAGAUCACACCACGGUCGCCACCAUG   | hdKRed |
| 79 | hsa-miR-483-5p  | MIMAT0004761 | GGUUCCGCGAUCGCGGAUCCCUCCCUUCUUCUCCUCCCGUCUUAAGAUCACACCACGGUCGCCACCAUG | hdKRed |
| 80 | hsa-miR-576-5p  | MIMAT0003241 | GGUUCCGCGAUCGCGGAUCCAAAGACGUGGAGAAAUAAGAAUAGAUCACACCACGGUCGCCACCAUG   | hdKRed |
| 81 | hsa-miR-146a-3p | MIMAT0004608 | GGUUCCGCGAUCGCGGAUCCUGAAGAACUGAAUUUCAGAGGAGAUCACACCACGGUCGCCACCAUG    | hdKRed |
| 82 | hsa-miR-584-3p  | MIMAT0022708 | GGUUCCGCGAUCGCGGAUCCAGCCUGGUUGGCCUGGAACUGAAGAUCACACCACGGUCGCCACCAUG   | hdKRed |
| 83 | hsa-miR-34a-3p  | MIMAT0004557 | GGUUCCGCGAUCGCGGAUCCAGGGCAGUAUACUUGCUGAUUGAGAUCACACCACGGUCGCCACCAUG   | hdKRed |
| 84 | hsa-miR-190a    | MIMAT0000458 | GGUUCCGCGAUCGCGGAUCCACCUAAUAUAUCAAACAUAUCAAGAUCACACCACGGUCGCCACCAUG   | hdKRed |
| 85 | hsa-miR-383     | MIMAT0000738 | GGUUCCGCGAUCGCGGAUCCAGCCACAUAUACCUUCUGAUUAAGAUCACACCACGGUCGCCACCAUG   | hdKRed |
| 86 | hsa-miR-326     | MIMAT0000756 | GGUUCCGCGAUCGCGGAUCCUGGAGGAAGGGCCCAGAGGAGAUAACACCACGGUCGCCACCAUG      | hdKRed |
| 87 | hsa-miR-576-3p  | MIMAT0004796 | GGUUCCGCGAUCGCGGAUCCGAUUCCAAUUUUUCCACAUCUUAAGAUCACACCACGGUCGCCACCAUG  | hdKRed |
| 88 | hsa-miR-219-5p  | MIMAT0000276 | GGUUCCGCGAUCGCGGAUCCAGAAUUGCGUUUGGACAAUCAAGAUCACACCACGGUCGCCACCAUG    | hdKRed |
| 89 | hsa-miR-342-5p  | MIMAT0004694 | GGUUCCGCGAUCGCGGAUCCUCAAUACAGAUAGCACCCCUAGAUCACACCACGGUCGCCACCAUG     | hdKRed |
| 90 | hsa-miR-590-3p  | MIMAT0004801 | GGUUCCGCGAUCGCGGAUCCACUAGCUUAUACAUAUUUUUAAGAUCACACCACGGUCGCCACCAUG    | hdKRed |
| 91 | hsa-miR-137     | MIMAT0000429 | GGUUCCGCGAUCGCGGAUCCCUACGCGUAUUCUUAAGCAAUAAAGAUCACCACGGUCGCCACCAUG    | hdKRed |
| 92 | hsa-miR-298     | MIMAT0004901 | GGUUCCGCGAUCGCGGAUCCUGGGAGAACCUCUCCUGCUUCUGCUAGAUCACCACGGUCGCCACCAUG  | hdKRed |
| 93 | hsa-miR-325     | MIMAT0000771 | GGUUCCGCGAUCGCGGAUCCACACUACUGGACACCUACUAGGAGAUCACCACGGUCGCCACCAUG     | hdKRed |
| 94 | hsa-miR-449a    | MIMAT0001541 | GGUUCCGCGAUCGCGGAUCCACCAGCUAACAAUACACUGCCAAGAUCACACCACGGUCGCCACCAUG   | hdKRed |
| 95 | hsa-miR-498     | MIMAT0002824 | GGUUCCGCGAUCGCGGAUCCGAAAAACGCCCCUUGGCUUGAAAAGAUCACCACGGUCGCCACCAUG    | hdKRed |
| 96 | hsa-miR-661     | MIMAT0003324 | GGUUCCGCGAUCGCGGAUCCACGCGCAGGCCAGAGACCCAGGCAAGAUCACCACGGUCGCCACCAUG   | hdKRed |

\*<sup>1</sup> The first G is the transcription start site where an anti-reverse cap analog is incorporated. The last AUG is the start codon of the reporter fluorescent protein.

\*<sup>2</sup> Oligo-DNAs that start with T7 promoter (5'-CGACTCACTATA) followed by the DNA sequence of 5' UTR listed in this table were used for the amplification of IVT templates via fusion PCR.



**Table S4. List of experimental conditions.**

| Experiment                                              | Item                        | Cell                                                     | Transfected RNA                           | Protocol                           |
|---------------------------------------------------------|-----------------------------|----------------------------------------------------------|-------------------------------------------|------------------------------------|
| Five-slot mRNAs to two different miRNAs                 | Fig. 2B,C<br>Table S1       | HeLa<br>(50,000 cells)                                   | hmAG1 (five-slot reporter, 80 ng)         | Forward transfection               |
|                                                         |                             |                                                          | tagBFP (control, 100 ng)                  |                                    |
|                                                         |                             |                                                          | miRNA inhibitor (total 4 pmol, 2 pmol x2) |                                    |
| Five-slot mRNAs to three different miRNAs               | Fig. 2C<br>Table S1         | HeLa<br>(50,000 cells)                                   | hmAG1 (five-slot reporter, 80 ng)         | Forward transfection               |
|                                                         |                             |                                                          | tagBFP (control, 100 ng)                  |                                    |
|                                                         |                             |                                                          | miRNA inhibitor (total 6 pmol, 2 pmol x3) |                                    |
| Five-slot mRNAs with multiple target sites to one miRNA | Fig. 3B,C, S2B<br>Table S1  | HeLa<br>(50,000 cells)                                   | hmAG1 (five/single-slot reporter, 80 ng)  | Forward transfection               |
|                                                         |                             |                                                          | tagBFP (control, 100 ng)                  |                                    |
|                                                         |                             |                                                          | miRNA inhibitor (2 pmol)                  |                                    |
| Screening of miRNA activity profiles* <sup>1</sup>      | Fig. 4A–C, 5A–C<br>Table S2 | All cells used in this study<br>(50,000 – 100,000 cells) | hmAG1 (single-slot reporter, 40 ng)       | Reverse transfection               |
|                                                         |                             |                                                          | tagBFP (single-slot reporter, 90 ng)      |                                    |
|                                                         |                             |                                                          | hdKRed (single-slot reporter, 400 ng)     |                                    |
|                                                         |                             |                                                          | hmKO2 (control, 20 ng)                    |                                    |
|                                                         | Fig. 5A–C<br>Table S2       | hiPSCs* <sup>2</sup> * <sup>3</sup>                      | hmAG1 (single-slot reporter, 40 ng)       | Forward* <sup>2</sup> transfection |
|                                                         |                             |                                                          | tagBFP (single-slot reporter, 90 ng)      |                                    |
|                                                         |                             |                                                          | hdKRed (single-slot reporter, 400 ng)     |                                    |
|                                                         |                             |                                                          | hmKO2 (control, 20 ng)                    |                                    |
| 2D density plot                                         | Fig. 4G, S4<br>Table S1     | All cells used in this study                             | hmAG1 (40 ng)                             | Reverse transfection               |
|                                                         |                             |                                                          | tagBFP (90 ng)                            |                                    |
|                                                         |                             |                                                          | hdKRed (400 ng)                           |                                    |
|                                                         |                             |                                                          | hmKO2 (20 ng)                             |                                    |
|                                                         | Fig. 5G, S5<br>Table S1     | hiPSCs* <sup>2</sup> * <sup>3</sup>                      | hmAG1 (40 ng)                             | Forward* <sup>2</sup> transfection |
|                                                         |                             |                                                          | tagBFP (90 ng)                            |                                    |
|                                                         |                             |                                                          | hdKRed (400 ng)                           |                                    |
|                                                         |                             |                                                          | hmKO2 (20 ng)                             |                                    |

\*<sup>1</sup> We used the same lot of four-mRNA mixtures throughout the screening to avoid noises in miRNA activity detection caused by mRNA mixing.

\*<sup>2</sup> hiPSCs were cultured without bFGF for 1-9 days on 24-well plates and subjected to forward transfection.

\*<sup>3</sup> Transfections into 50,000 hiPSCs on days 0 and 14 were performed with the reverse transfection protocol.
